# Supplementary material for: Natural corollaries and recovery after acute ACL injury: the NACOX cohort study protocol
Source: PubMed Central journal article supplement — BMJ Open. 2018 Jun 27;8(6):e020543. doi: 10.1136/bmjopen-2017-020543 (PMC6020951; doi:10.1136/bmjopen-2017-020543), 2018-06-27
Supplement: bmjopen-2017-020543.draft_revisions.pdf [file bmjopen-2017-020543.draft_revisions.pdf]

# BMJ Open

BMJ Open is committed to open peer review. As part of this commitment we make the peer review history of every article we publish publicly available.

When an article is published we post the peer reviewers' comments and the authors' responses online. We also post the versions of the paper that were used during peer review. These are the versions that the peer review comments apply to.

The versions of the paper that follow are the versions that were submitted during the peer review process. They are not the versions of record or the final published versions. They should not be cited or distributed as the published version of this manuscript.

BMJ Open is an open access journal and the full, final, typeset and author-corrected version of record of the manuscript is available on our site with no access controls, subscription charges or pay-per-view fees (<http://bmjopen.bmj.com>).

If you have any questions on BMJ Open's open peer review process please email [info.bmjopen@bmj.com](mailto:info.bmjopen@bmj.com)

# BMJ Open

## Natural corollaries and recovery after acute ACL injury – the NACOX cohort study protocol

|                               |                                                                                                                                                                                                                                                                                                                                                                                                                                                                                                                                                                                                                                        |
|-------------------------------|----------------------------------------------------------------------------------------------------------------------------------------------------------------------------------------------------------------------------------------------------------------------------------------------------------------------------------------------------------------------------------------------------------------------------------------------------------------------------------------------------------------------------------------------------------------------------------------------------------------------------------------|
| Journal:                      | <i>BMJ Open</i>                                                                                                                                                                                                                                                                                                                                                                                                                                                                                                                                                                                                                        |
| Manuscript ID                 | bmjopen-2017-020543                                                                                                                                                                                                                                                                                                                                                                                                                                                                                                                                                                                                                    |
| Article Type:                 | Protocol                                                                                                                                                                                                                                                                                                                                                                                                                                                                                                                                                                                                                               |
| Date Submitted by the Author: | 11-Dec-2017                                                                                                                                                                                                                                                                                                                                                                                                                                                                                                                                                                                                                            |
| Complete List of Authors:     | Kvist, Joanna; Medical and Health Sciences, Physiotherapy; Neurobiology, Care Sciences and Socie, Division of Physiotherapy<br>Gauffin, Håkan; Department of Clinical and Experimental Medicine<br>Tigerstrand Grevnerts, Hanna; Department of Medical and Health Sciences, Division of Physiotherapy<br>Ardern, CL; Linköping University, Division of Physiotherapy<br>Hagglund, Martin; Department of Medical and Health Sciences, Division of Physiotherapy<br>Stålman, Anders; Capio ArthroClinic, Stockholm Sports Trauma Research Center, Sophiahemmet<br>Frobell, Richard; Lund University, Orthopedics, Clinical Sciences Lund |
| Keywords:                     | Knee < ORTHOPAEDIC & TRAUMA SURGERY, Musculoskeletal disorders < ORTHOPAEDIC & TRAUMA SURGERY, Magnetic resonance imaging < RADIOLOGY & IMAGING, SPORTS MEDICINE, Orthopaedic & trauma surgery < SURGERY                                                                                                                                                                                                                                                                                                                                                                                                                               |
|                               |                                                                                                                                                                                                                                                                                                                                                                                                                                                                                                                                                                                                                                        |

SCHOLARONE™  
Manuscripts

Only

## Study protocol

Natural corollaries and recovery after acute ACL injury – the NACOX cohort study protocol

J Kvist, H Gauffin, H Tigerstrand Grevnerts, C Ardern, M Hägglund, A Stålmán, R Frobell

NACOX Cohort Study group

### Contact information:

#### Principal investigator:

Joanna Kvist, physiotherapist,  
Professor, Division of Physiotherapy, Department of Medical and Health Sciences, Linköping University, Sweden;  
Center for Medical Image Science and Visualization (CMIV), Department of Medical and Health Sciences, Linköping University, Sweden;  
Division of Physiotherapy, Department of Neurobiology, Care Sciences and Society, Karolinska Institutet, Stockholm, Sweden;  
joanna.kvist@liu.se, Tel +46 732 713077

#### Co-investigators:

- Håkan Gauffin, MD, PhD, Department of Orthopaedics, Linköping University, Linköping, Sweden
- Hanna Tigerstrand Grevnerts, physiotherapist, PhD student, Division of Physiotherapy, Department of Medical and Health Sciences, Linköping University, Sweden
- Richard Frobell, PhD, Associate Professor, Orthopedics, Clinical Sciences Lund, Lund University, Sweden
- Clare Ardern, physiotherapist, post-doctoral researcher, Division of Physiotherapy, Department of Medical and Health Sciences, Linköping University, Sweden; School of Allied Health, La Trobe University, Melbourne, Australia
- Martin Hägglund, physiotherapist, Associate Professor, Division of Physiotherapy, Department of Medical and Health Sciences, Linköping University, Sweden
- Anders Stålmán, MD PhD, Capio ArtroClinic, Stockholm Sports Trauma Research Center, Sophiahemmet, Stockholm

#### Collaborators:

- Michael A Bowes, Sr Director Clinical Applications, Imorphics Ltd, Manchester, UK
- Victor Casula, PhD, Research Unit of Medical Imaging, Physics and Technology, University of Oulu, Finland
- Anna Fahlgren, Associate Professor, Experimetell Ortopedi, Department of Clinical and Experimental Medicine, Linköping University, Sweden

- Anne Fältström, Physiotherapist, PhD, Region Jönköping County, Rehabilitation Centre, Ryhov County Hospital, Jönköping
- Johan Kihlberg, Radiographer, Center for Medical Image Science and Visualization (CMIV), Department of Medical and Health Sciences, Linköping University, Sweden
- Barbro Krevers, Associate Professor, Division of Health Care Analysis, Department of Medical and Health Sciences, Linköping University, Sweden
- Maria Lindblom, MD Center for Medical Image Science and Visualization (CMIV), Department of Radiology, Linköping University, Sweden
- Per Magnusson, Adjunct Professor, Clinical Chemistry, Department of Clinical and Experimental Medicine, Linköping University, Sweden
- Miika Nieminen, Professor, Research Unit of Medical Imaging, Physics and Technology, University of Oulu, Finland; Department of Diagnostic Radiology, Oulu University Hospital, Finland
- Anders Persson, Professor, Center for Medical Image Science and Visualization (CMIV), Department of Medical and Health Sciences, Linköping University, Sweden

## ABSTRACT

### Introduction

Anterior cruciate ligament (ACL) injury can result in joint instability, decreased functional performance, reduced physical activity and quality of life, and an increased risk for post-traumatic osteoarthritis. Despite the development of new treatment techniques and extensive research, the complex and multifaceted nature of ACL injury and its consequences are yet to be fully understood. The overall aim of the NACOX study is to evaluate the natural corollaries and recovery after an ACL injury.

### Methods and analysis

The NACOX study is a multi-centre prospective prognostic cohort study of patients with acute ACL injury. At 7 sites in Sweden, we will include patients aged 15-40 years, within 6 weeks after primary ACL injury. Patients will complete questionnaires at multiple occasions over the 3 years following injury or the 3 years following ACL reconstruction (for participants who have surgical treatment). In addition, a subgroup of 130 patients will be followed with clinical examinations, several imaging modalities, and biological samples. Data analyses will be specific to each aim.

### Ethics and dissemination

This study has been approved by the regional Ethical committee in Linköping, Sweden (Dnr 2016/44-31 and 2017/221-32). We plan to present the results at national and international conferences, and in peer-reviewed scientific journals. Participants will receive a short summary of the results following completion of the study.

*Trial registration:* NCT02931084

### Strengths and limitations of this study

- The NACOX study will improve understanding of the biological, psychological and social consequences of an acute ACL injury.
- The combination of frequently-monitored biological, psychological and social data allows analysis of outcomes at key, clinically-relevant time points after injury.
- In collecting data from patients and clinicians (orthopaedic surgeons and physiotherapists), this study considers the perspectives of important stakeholders in acute ACL injury management.
- The utilisation of advanced imaging techniques and collection of biological samples for identification of proxies of early osteoarthritis that can be related to prospectively collected patient-reported outcome measures and clinical data.
- Loss to follow-up and missing data may be a risk due to the extensive collection of patient-reported outcomes. However, we have a dedicated study monitoring team, and a rigorous data analysis plan to appropriately deal with missing data.

## INTRODUCTION

Anterior cruciate ligament (ACL) injuries are common in young athletes. In Sweden, there are approximately 7000 new injuries per year representing approximately 0.81/1000 inhabitants aged 10-64 years.<sup>1</sup> Despite the extensive research to identify the best treatment algorithms, there are still many patients who report unsatisfactory outcomes regarding knee stability, activity level and quality of life following ACL injury.<sup>2,3</sup> This may be because research has tended to focus on single factors, rather than accounting for the multifactorial nature of injury and recovery. There is also a clinical dogma that ACL reconstruction is necessary for a successful outcome after ACL injury and to resume sporting activities.<sup>4,5</sup> Although there is evidence that some patients have functional disability fulfilling the clinical indications for ACL reconstruction,<sup>6</sup> with high quality rehabilitation, many patients achieve satisfactory knee function and participation in sports without surgery.<sup>7,8</sup>

An ACL injury has biological, psychological and social corollaries,<sup>9</sup> that directly affect the patient (e.g. impaired quality of life and lower physical activity participation), and may affect the community (e.g. increased health utilisation costs, impaired productivity, potential for increased chronic disease burden through flow-on development of non-communicable diseases associated with physical inactivity such as cardiovascular disease and diabetes). Taking a biopsychosocial approach, factors including the extent of the initial injury (e.g. whether there were other knee structures involved), factors directly related to the treatment (e.g. which intervention and when), and patient preferences, expectations and past experiences may all be relevant when assessing outcomes.

The most serious long-term corollary after ACL injury is the increased risk for post-traumatic osteoarthritis, estimated to be up to 50% by 15 years after injury.<sup>3</sup> This risk of developing osteoarthritis is higher if the ACL injury is associated with a meniscus tear, and there are conflicting results regarding whether having ACL reconstruction reduces or increases the risk of osteoarthritis.<sup>4,5,10-12</sup> The underlying mechanisms behind the development of osteoarthritis are not well understood. Altered biological processes due to injury and joint bleeding, concomitant structural injuries to the cartilage and the subchondral bone, and joint instability and subsequent altered biomechanics, may be relevant for the development of osteoarthritis. Secondary joint trauma (e.g. with additional meniscal tears, or ACL reconstruction<sup>13</sup>) may also influence the risk for osteoarthritis.

1  
2  
3 Outcomes need to be evaluated from both the patient's and the clinician's perspective.  
4 Patient-reported outcomes provide important insights into aspects of injury and recovery  
5 that cannot otherwise be observed or measured with clinical tests or imaging.<sup>14</sup> Clinical  
6 outcomes provide the clinician (and by extension – in a well applied shared decision-making  
7 approach – the patient) with feedback regarding the effects of different clinical decisions on  
8 injury (i.e. which treatment and when), and any physical changes that occur following a  
9 clinical decision (e.g. change in effusion and muscle strength, incidence of new injuries,  
10 development of osteoarthritis).  
11

12  
13  
14  
15  
16  
17 The short-term aim of ACL injury management is to achieve satisfactory knee function and  
18 physical activity participation. In the long-term, treatment should aim to reduce the risk of  
19 developing osteoarthritis. Satisfaction is complex and short-term success (e.g. returning to  
20 pivoting sports) may facilitate longer term failure (e.g. developing osteoarthritis after  
21 sustaining a second or third meniscal injury). From the patient's perspective, satisfaction can  
22 relate to both the outcome of management of the injury (including knee function,  
23 confidence to participate in physical activity, fulfillment of expectations for recovery), and to  
24 the process of health care delivery (including being an active participant in the decision  
25 making process, communication with clinicians, information about the injury and  
26 treatment).<sup>15-18</sup> The clinician needs to monitor the resolution of impairments (knee stability,  
27 symmetrical lower limb muscle strength, absence of knee effusion), to ensure that  
28 treatment is tailored so that the patient has the physical capacity to reach his or her  
29 expectations (e.g. return to sport, return to occupation).<sup>19</sup> However, it is evident that these  
30 criteria cover only some of the spectrum of possible corollaries of ACL injury.  
31

32  
33  
34  
35  
36  
37  
38  
39  
40  
41  
42 There is evidence that treatment after ACL injury needs to be individualised.<sup>20</sup> The clinician  
43 needs to be able to account for and (ideally) address the important biological, psychological  
44 and social factors for each patient. However, we still lack evidence regarding which factors,  
45 for which patient, at which time; and this poses challenges for clinical practice. Therefore, to  
46 enhance understanding of the consequences of ACL injury, and improve treatment, the  
47 overall aim of the NACOX study is to investigate the natural corollaries and recovery after  
48 ACL injury. Understanding the complexity of the consequences of ACL injury may improve  
49 clinical decision-making to ensure best health care for patients.  
50

51  
52  
53  
54  
55  
56 To achieve the overall aim, there are five main study objectives:  
57  
58  
59  
60

- 1
- 2
- 3 A. To assess biological, psychological and social factors and their relationships to the
- 4 natural corollaries and recovery after acute ACL injury
- 5
- 6 B. To evaluate the choice of treatment after acute ACL-injury (i.e. ACL reconstruction,
- 7 ACLR or non-ACL reconstruction, non-ACLR)
- 8
- 9 C. To evaluate the return to sport after acute ACL injury
- 10
- 11 D. To study knee problems in the short and long term after acute ACL-injury
- 12
- 13 E. To identify proxies (biomarkers and structural risk factors) for early detection of
- 14 symptomatic and radiographic osteoarthritis
- 15
- 16
- 17
- 18
- 19

## 20 METHODS AND ANALYSIS

21 This study is a prospective multicenter prognostic cohort study. Patients will be consecutively  
22 recruited over approximately 12 months, from up to seven sites (mix of public and private  
23 health care clinics) in Sweden.

### 24 Inclusion and exclusion criteria

25 All patients with acute knee trauma presenting to the identified clinics are potentially  
26 eligible for participation.

27 Inclusion criteria: Patients with an ACL injury, sustained no more than 6 weeks prior to  
28 presentation, and aged between 15 and 40 years at time of ACL injury.

29 Exclusion criteria: previous ACL injury/ACL reconstruction on the same knee, serious  
30 concomitant knee injury, e.g. fracture that requires separate treatment, inability to  
31 understand written and spoken Swedish language, cognitive impairments, other illness or  
32 injury that impairs function (e.g. fibromyalgia, rheumatic diseases and other diagnoses  
33 associated with chronic pain).

### 34 Procedure

35 Recruitment of participants started in October 2016, and this study does not alter the usual  
36 course of treatment for patients with ACL injury at recruiting centres. This process is:

- 37 1. Patient receives a clinical diagnosis from an orthopedic surgeon, verified by MRI,  
38 within 2-6 weeks after their knee injury.
- 39
- 40
- 41
- 42
- 43
- 44
- 45
- 46
- 47
- 48
- 49
- 50
- 51
- 52
- 53
- 54
- 55
- 56
- 57
- 58
- 59
- 60



- 2
- 3 2. Initial treatment according to a supervised rehabilitation program of approximately
- 4 three months duration.<sup>21</sup>
- 5
- 6 3. Scheduled follow-up visit after approximately 3 months, where further treatment is
- 7 decided upon between patient and orthopaedic surgeon.
- 8
- 9

10 Consequently, patients of this cohort will follow one of the two following pathways: (1) ACLR  
11 plus post-operative supervised rehabilitation and (2) supervised rehabilitation alone (non-  
12 ACLR).  
13  
14

15  
16 Patients are asked to participate in the study at their initial contact with the health care  
17 provider. Patients who accept participation will be sent questionnaires via smart phone or e-  
18 mail. Questionnaires will be sent weekly for the first 6 weeks, fortnightly from week 7 to  
19 week 24, monthly from month 7 to month 12, and bi-monthly from year 1 to year 3 after  
20 initial injury. Questionnaire length varies from very short (10 questions, approximately 2  
21 completion time) to longer at specific critical time points (Figure 1 and Table 1).  
22  
23

24  
25 A questionnaire about treatment choice (ACLR or non-ACLR) is completed by the patient,  
26 orthopedic surgeon and physiotherapist at the time the decision for ACLR or non-ACLR is  
27 made. A questionnaire about the decision to return to sport is completed by the patient and  
28 the physiotherapist when the patient reports that he/she is back to full participation in the  
29 goal sports/physical activity. For patients with ACLR, a new baseline questionnaire will be  
30 completed at the time of reconstruction. Subsequent data collection will continue according  
31 to the new baseline time point (Figure 1).  
32  
33

34  
35 One subgroup (approximately 130 patients recruited from Linköping) will have extended  
36 follow-up data collection at baseline and 3, 6, 12 and 24 months after injury. At these time  
37 points, a clinical examination will be completed by a physiotherapist, physical activity will be  
38 registered over 5 consecutive days using a triaxial accelerometer (activPAL™,  
39 PALtechnologies, UK), knee MRI will be performed, and blood and urine samples will be  
40 collected. A joint fluid sample is acquired at baseline if indicated due to joint effusion, and at  
41 the time of any additional surgery including ACLR (if the patient has surgical treatment).  
42 Weight bearing radiographs are done at baseline and 5 years follow up. Patients who have  
43 ACLR are followed up with questionnaires and clinical examination with new baseline at the  
44  
45  
46  
47  
48  
49  
50  
51  
52  
53  
54  
55  
56  
57  
58  
59  
60

time of reconstruction. MRIs and blood and urine samples are followed up with the injury according to the index baseline (Figure 1).

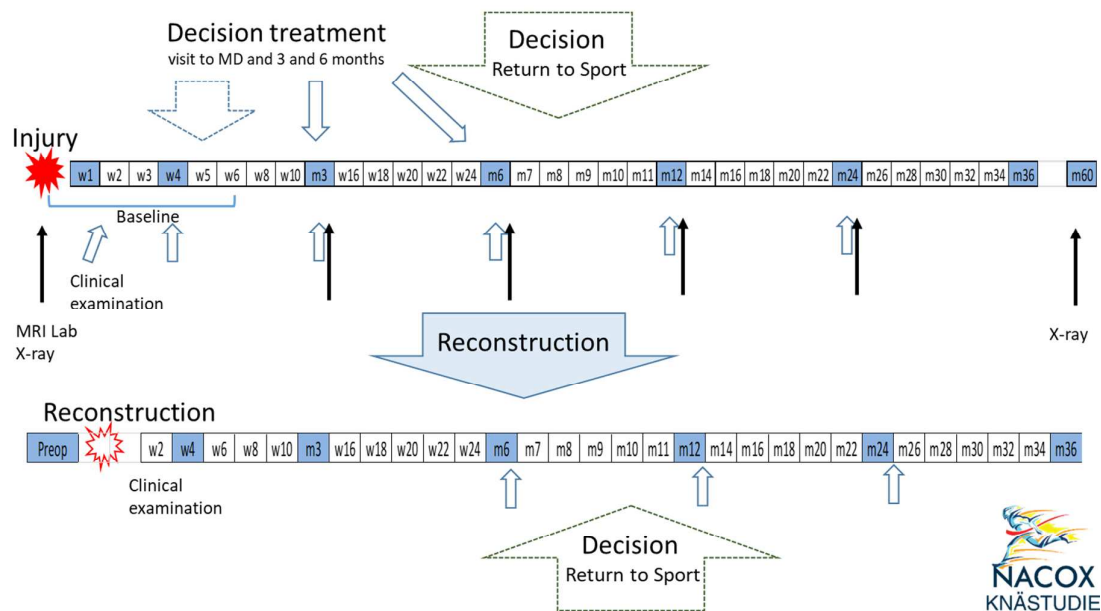

Figure 1. Flow chat of the NACOX study follow-up plan. w1, w2 and m3, m6 etc: weeks resp months after injury. Each box denotes when a questionnaire will be sent; blue marked boxes indicate extended questionnaires. Time points for clinical examination (blue arrows), Magnetic Resonance Imaging (MRI) and lab and x-rays (black arrows) are indicated Baseline questionnaire, clinical examination, MRI, lab and x-ray are within 6 weeks after the injury.

## Outcomes

Reflecting a biopsychosocial approach, outcome measurement for this study will evaluate four main aspects: patient-reported outcomes, physical function, physical activity and physiological markers of joint injury (Table 1).

### Patient-reported outcomes: all study participants

Demographic and baseline characteristics including age, sex, BMI, smoking habits, occupation, preinjury activity level, medical and injury history, sick leave, preferences regarding treatment will be collected with the baseline questionnaire.

1  
2  
3 Patient-reported *knee function and participation* will be assessed with the International  
4 Knee Documentation Committee Subjective Knee Form (IKDC-SKF),<sup>22</sup> a Single Assessment  
5 Numeric Evaluation (SANE) of global knee function,<sup>23</sup> and the four subscales of Knee injury  
6 and Osteoarthritis Outcome Score (Pain, other Symptoms, Function in sport and recreation  
7 (Sport/Rec) and knee related Quality of life (QOL); KOOS<sub>4</sub>).<sup>24</sup> Subjective *knee stability* during  
8 ADL and sports will each be assessed with a single numeric rating scale (1-10 scale).  
9  
10  
11  
12

13  
14 The frequency of self-reported participation in *physical activity* will be collected according to  
15 the recommendations from Swedish National Board of Welfare. Participants will report the  
16 type of physical activity they participated in (e.g. football, strength training), and the level of  
17 participation (e.g. recreational, elite), during the previous week. Participation in up to 3  
18 activities can be recorded.<sup>25</sup>  
19  
20  
21  
22

23  
24 *Expectations* for recovery (2 questions) and fulfillment of expectations (1 question) will be  
25 assessed using 6-item Likert scales. Participants will be asked to indicate if their goal was to  
26 return to sport and reasons for not returning. *Motivation* to return to the preinjury physical  
27 activity will be evaluated using a questionnaire we developed based on the transtheoretical  
28 model of behavior change.<sup>18</sup>  
29  
30  
31  
32

33  
34 The General *Self Efficacy* scale (GSES) will be used at baseline to assess the individual's  
35 beliefs that his/her actions determine successful outcome.<sup>26</sup> Knee-specific self-efficacy will  
36 be assessed with the subscale of the Knee Self Efficacy Scale (K-SES) that evaluates patients'  
37 perception of future knee function (4 questions).<sup>27</sup> *Psychological readiness* for return to  
38 sport will be assessed with the ACL-Return to Sport after Injury (ACL-RSI) questionnaire that  
39 includes questions on confidence in performance, emotions and risk appraisal.<sup>28</sup> *Satisfaction*  
40 with present knee function will be evaluated with a 7-item Likert scale ranging from  
41 "delighted" to "terrible".<sup>29</sup> Knee-related quality of life (QoL) will be assessed with the ACL-  
42 QoL questionnaire.<sup>30</sup>  
43  
44  
45  
46  
47  
48  
49

50 Participants will be asked to indicate the *number of rehabilitation sessions* they have  
51 completed. *Adherence* to rehabilitation will be assessed by the patient and physiotherapist  
52 with the Sports Injury Rehabilitation Adherence Scale.<sup>31</sup> The importance of rehabilitation for  
53 the current knee function will be assessed on a 5-response scale ranging from "necessary for  
54  
55  
56  
57  
58  
59  
60

1  
2  
3 my current knee function” to “not necessary at all”<sup>32</sup>. Experience with health care will be  
4 assessed with a 5-item Likert scale ranging from “very good” to “very bad”.

5  
6  
7 Information about *new knee injuries* will be collected using a direct question, which is  
8 followed up with phone call if the injury is severe, i.e. results in functional limitation during  
9 the following days or inability to participate in physical activity. *Knee problems during*  
10 *physical activity participation* will be assessed with the knee-specific part of the Oslo Sports  
11 Trauma Research Centre (OSTRC) questionnaire.<sup>33</sup>  
12  
13  
14  
15  
16  
17  
18  
19  
20  
21  
22  
23  
24  
25  
26  
27  
28  
29  
30  
31  
32  
33  
34  
35  
36  
37  
38  
39  
40  
41  
42  
43  
44  
45  
46  
47  
48  
49  
50  
51  
52  
53  
54  
55  
56  
57  
58  
59  
60

Table 1. Reported outcomes at different time points after injury or reconstruction.

| Blå färg enbart ejrec. Röd färg - enbart R |          |    |    |    |                |    |    |    |     |     |     |     |     |     |     | once a month   |                |                | every other month |                |                | every other month |                |  |  |
|--------------------------------------------|----------|----|----|----|----------------|----|----|----|-----|-----|-----|-----|-----|-----|-----|----------------|----------------|----------------|-------------------|----------------|----------------|-------------------|----------------|--|--|
| Injury                                     | Baseline | w1 | w2 | w3 | w4             | w5 | w6 | w8 | w10 | m3  | w16 | w18 | w20 | w22 | w24 | m6             | m7- 11         | m12            | m14- 22           | m24            | m26- 36        | m36               | Extra          |  |  |
| Reconstruction                             | Peop     | -  | w2 | -  | w4             | -  | w6 | w8 | w10 | m3  | w16 | w18 | w20 | w22 | w24 | m6             | m7- 11         | m12            | m14- 22           | m24            | m26- 36        | m36               |                |  |  |
| Demographics and baseline                  | x        |    |    |    |                |    |    |    |     | (x) |     |     |     |     |     | (x)            |                |                |                   |                | (x)            |                   | (x)            |  |  |
| Knee function and participation            |          |    |    |    |                |    |    |    |     |     |     |     |     |     |     |                |                |                |                   |                |                |                   |                |  |  |
| IKDC-SKF                                   |          | x  |    |    | x              |    |    |    |     | x   |     |     |     |     |     | x              |                |                |                   |                | x              |                   | x              |  |  |
| SANE                                       | x        | x  | x  | x  | x              | x  | x  | x  | x   | x   | x   | x   | x   | x   | x   | x              | x              | x              | x                 | x              | x              | x                 | x              |  |  |
| Subjective knee stability                  | x        | x  |    |    | x              |    |    |    |     | x   |     |     |     |     |     | x              |                |                |                   |                | x              |                   | x              |  |  |
| Giving way                                 |          | x  |    |    |                |    |    |    |     | x   |     |     |     |     |     | x              |                |                |                   |                | x              |                   | x              |  |  |
| KOOS <sub>4</sub>                          |          |    |    |    |                |    |    |    |     |     |     |     |     |     |     |                |                |                |                   |                | x              |                   | x              |  |  |
| Physical activity participation            | x        | x  | x  | x  | x              | x  | x  | x  | x   | x   | x   | x   | x   | x   | x   | x              | x              | x              | x                 | x              | x              | x                 | x              |  |  |
| Expectations and fulfillment               | x        | x  |    |    | x              |    |    |    |     | x   |     |     |     |     |     | x              |                |                |                   |                | x              |                   |                |  |  |
| Motivation to RTS                          | x        | x  |    |    | x              |    |    |    |     | x   |     |     |     |     |     | x              |                |                |                   |                | x              |                   |                |  |  |
| RTS (goal and actual RTS)                  | x        | x  |    |    | x              |    |    |    |     | x   |     |     |     |     |     | x              |                |                |                   |                | x              |                   | x              |  |  |
| Reasons for not RTS                        |          |    |    |    |                |    |    |    |     | x   |     |     |     |     |     | x              |                |                |                   |                | x              |                   | x              |  |  |
| Factors affecting RTS                      |          |    |    |    |                |    |    |    |     |     |     |     |     |     |     |                |                |                |                   |                |                |                   | x <sup>2</sup> |  |  |
| Psychological factors                      |          |    |    |    |                |    |    |    |     |     |     |     |     |     |     |                |                |                |                   |                |                |                   |                |  |  |
| General self efficacy                      | x        |    |    |    |                |    |    |    |     |     |     |     |     |     |     |                |                |                |                   |                |                |                   |                |  |  |
| Knee self efficacy                         | x        | x  |    |    | x              |    |    |    |     | x   |     |     |     |     |     | x              |                |                |                   |                | x              |                   |                |  |  |
| ACL-RSI                                    |          |    |    |    |                |    |    |    |     | x   |     |     |     |     |     | x              |                |                |                   |                |                |                   |                |  |  |
| Satisfaction                               |          |    |    |    |                |    |    |    |     | x   |     |     |     |     |     | x              |                |                |                   |                | x              |                   | x              |  |  |
| Quality of Life                            |          |    |    |    | x <sup>4</sup> |    |    |    |     | x   |     |     |     |     |     |                |                |                |                   |                | x              |                   |                |  |  |
| Rehabilitation and health care             |          |    |    |    |                |    |    |    |     |     |     |     |     |     |     |                |                |                |                   |                |                |                   |                |  |  |
| Frequency                                  |          |    | x  | x  | x              | x  | x  | x  | x   | x   | x   | x   | x   | x   | x   | x              | x              | x              | x                 | x              | x              | x                 | x              |  |  |
| Adherence                                  |          |    |    |    |                |    |    |    |     | x   |     |     |     |     |     | x              |                |                |                   |                |                |                   | x <sup>2</sup> |  |  |
| Importance                                 |          | x  |    |    |                |    |    |    |     | x   |     |     |     |     |     | x              |                |                |                   |                | x              |                   |                |  |  |
| Experience with health care                |          | x  |    |    |                |    |    |    |     | x   |     |     |     |     |     | x              |                |                |                   |                | x              |                   |                |  |  |
| Decision of treatment*                     |          |    |    |    |                |    |    |    |     | x   |     |     |     |     |     | x              |                |                |                   |                |                |                   | x <sup>1</sup> |  |  |
| New injuries                               |          | x  | x  | x  | x              | x  | x  | x  | x   | x   | x   | x   | x   | x   | x   | x              | x              | x              | x                 | x              | x              | x                 | x              |  |  |
| Problems during physical activity          |          |    |    |    |                |    |    |    |     |     |     |     |     |     |     | x <sup>3</sup> | x <sup>3</sup> | x <sup>3</sup> | x <sup>3</sup>    | x <sup>3</sup> | x <sup>3</sup> | x <sup>3</sup>    | x <sup>3</sup> |  |  |

KOOS<sub>4</sub>: Knee injury and Osteoarthritis Outcome Score, subscales for pain, symptoms, function in sport and recreation (sport/rec) and knee related Quality of life (QoL). RTS: return to sports. \* answered by the patient, orthopedic surgeon and physical therapist. (x): only some questions are asked during these timepoints. x<sup>1</sup>: Q answered when the decision for ACLR is taken. x<sup>2</sup>: Q is answered by the patient and physical therapist when the patient RTS to full sports participation. x<sup>3</sup>: assessed only for non-ACLR. x<sup>4</sup>: Only the subscales "life style" and "social and emotional" of the ACL-QoL

### Clinical examination: sub-group of study participants

The sub-group of participants recruited from one of the study sites (Linköping) will have clinical examinations of knee function, performed by either an orthopedic surgeon together with a physiotherapist (always for the baseline assessment), or physiotherapist alone, or physiotherapy student in the final year of education. All assessors will have standardised training in the clinical examination procedure.

*Knee status* will be assessed using knee joint effusion (circumference of the joint using a measurement tape, and the 'stroke test'<sup>34</sup>), knee joint laxity tests (Lachman test, Lever sign, anterior drawer and medial/lateral laxity), knee flexion and extension and ankle dorsiflexion range of motion, varus or valgus knee alignment. Instrumented knee laxity measurements will be assessed using the KT-1000 arthrometer at 133N and manual maximum (mean value of three repetitions).

*Functional performance* will be evaluated through qualitative assessment of gait (10m walking test), single leg squat, and four single-limb hop tests (single hop for distance, triple hop, crossover hop and 6-meter timed-hop).<sup>35</sup> *Postural control* will be assessed using a single-limb static balance task with eyes closed (SOLEC). Concentric quadriceps and hamstrings *strength* will be assessed using a Biodex dynamometer, at 60 degrees/second (5 repetitions) and 180 degrees/second (15 repetitions) angular velocities.

### Activity registration: sub-group of study participants

At the conclusion of the clinical examination, participants will be asked to wear a triaxial accelerometer (activPAL<sup>TM</sup> micro, PAL Technologies Ltd.) for a minimum of 5 days (maximum 7 days) immediately following the examination. The accelerometer will be attached mid-way between the hip and the injured knee according to the manufacturer's recommendations.

### Imaging: sub-group of study participants

Patients recruited in Linköping (approximately 130 patients) will undergo extensive imaging assessment and collection of biosamples.

Plain weight bearing *radiographs* – the current gold standard for assessment of radiographic osteoarthritis – will be obtained using a slightly modified method of the Lyon-Schuss view (participants stand, bearing equal weight through each limb<sup>36</sup>) and a standardised axial patellofemoral joint view (Table 2).<sup>37</sup>

*Magnetic resonance (MR) images* will be obtained from both knees at baseline for diagnostic purposes, to confirm an acute ACL tear in the index knee and to examine the status of the contralateral knee. At follow up, only the index knee will undergo MR image acquisition. MR images will be acquired using a Philips Ingenia 3T scanner with a 16-channel knee-coil and will be obtained at baseline, 3, 6, 12 and 24 months (Table 2).

Table 2. MR imaging, radiographic assessment and collection of biological samples over the study period for patients recruited at the Linköping site

|                        | Baseline | 3 months | 6 months | 12 months | 24 months | 60 months |
|------------------------|----------|----------|----------|-----------|-----------|-----------|
| WB radiographs         | X        | -        | -        | -         | -         | X         |
| Full clinical protocol | X*       | -        | -        | -         | -         | -         |
| Compositional protocol | X        | X        | X        | X         | -         | -         |
| Explorative protocol   | X        | X        | X        | X         | X         | X         |
| Blood                  | X        | X        | X        | X         | X         | X         |
| Urine                  | X        | X        | X        | X         | X         | X         |
| Joint fluid**          | X        |          |          |           |           |           |

\* *Bilateral assessment*

\*\* *Collection will be performed under anesthesia at the time of any surgery during follow up*

For *clinical evaluation and diagnostics*, the normal clinical protocol at the Linköping site will be followed (total scantime 15 minutes, Table 3).

For *bone shape analyses*, a 3D PD sequence (scantime 6.5 minutes, Table 3) will be obtained.

For *compositional analysis* of cartilage and menisci, sagittal T2maps and T1Rho will be obtained (total scantime approx. 16 minutes, Table 3).

For *exploratory purposes*, a new in-house developed sequence (Qmap) with the potential of reducing clinical and compositional scantime and adding explorative measures of T1-maps T2-maps and PD-maps will be obtained (total scantime approximately 6 minutes, Table 3).<sup>38</sup>

Table 3. Detailed description of MR imaging sequences

|                  |                                                                                                                                                                                                                 |
|------------------|-----------------------------------------------------------------------------------------------------------------------------------------------------------------------------------------------------------------|
| Clinical package | Sagittal PD, 3 mm slice thickness with 0.3 mm gap. TE=20 ms; TR=1800 ms, ETL 10; FOV 160x145, ACQ matrix 516x384=0.31x0.38mm, recon matrix 528. Scantime 2:58 min.                                              |
|                  | Axial PD FatSat, 3 mm slice thickness with 0.3 mm gap. TE=35 ms; TR=3981 ms, ETL 15; FOV 140x140, ACQ matrix 332x330=0.42x0.42mm, recon matrix 512. Scantime 4:15min                                            |
|                  | Sagittal PD FatSat, 3 mm slice thickness with 0.3 mm gap. TE=30 ms; TR=3400 ms, ETL 15; FOV 160x145, ACQ matrix 468x399=0.31x0.40mm, recon matrix 528. Scantime 3:56min.                                        |
|                  | Coronal PD FatSat, 3 mm slice thickness with 0.3 mm gap. TE=30 ms; TR=3572 ms, ETL 16; FOV 160x140, ACQ matrix 516x332=0.31x0.42mm, recon matrix 528. Scantime 3:56min                                          |
| PD FS 3D         | Sagittal PD FatSat 3D, 0.63 mm slice thickness, TE=185, TR=1300, ETL=63, FOV=144x162, AQC matrix 228x226=0.63x0.63, recon matrix 448. Scantime 6:31min                                                          |
| T2map            | Sagittal T2-map (T2 relaxation), 3 mm slice thickness with 0.3 mm gap. TE=n*10 ms; TR=2371 ms, ETL 8; FOV 160x140, ACQ matrix 456x280=0.35x0.50mm, recon 560. Scantime 5:53min                                  |
| T1Rho            | 3D sagittal SpinLock (T1Rho relaxation), 4 mm slice thickness. TE=3.3 ms; TR=6.4 ms, ETL 64; FOV 140x140, ACQ matrix 280x268=0.50x0.52mm, recon 352. Scantime 2:36min                                           |
| Qmap             | Sagittal Qmap (T1 relaxation, T2 relaxation, Proton Density), 3 mm slice thickness with 0.3 mm gap. TE=8.8/110 ms; TR=4217 ms, ETL 16; FOV 160x145, ACQ matrix 364x270=0.40x0.59mm, recon 576. Scantime 6:19min |

### Collection and storage of biological samples: sub-group of study participants

All samples will be stored in a dedicated biobank at -70°C.

*Joint fluid* (haemarthrosis) will be aspirated from the index knee at baseline to ascertain joint bleeding (highly indicative of severe knee injury), according to clinical routine. Due to the pain and discomfort associated with knee joint arthrocentesis (especially in knees without effusion), additional longitudinal collection of joint fluid will only be performed in case of



surgical procedure (collection will be during surgery). Collected samples will be centrifuged at 2500G for 10 minutes and aliquoted into 0.7ml tubes for storage.

*Venous blood* samples will be collected at the same visit as image acquisition. Collected samples will be centrifuged and aliquoted according to a specific protocol for storage.

*Urine samples* will be collected at first morning void (preferred). Collected samples will be centrifuged at 1800G for 10 minutes and aliquoted into 1.0mL tubes for storage at -70°C.

Analyses will include, but are not limited to, those presented in Table 4. In addition, several markers of inflammation, such as IL-6, IL-8, IL-10, IL-12, TNF- $\alpha$ , INF- $\gamma$ , will be analysed.

Table 4. Planned analyses of biomarkers

| BIOMARKER            | FLUID                   | PROCESS                      | TISSUE            |
|----------------------|-------------------------|------------------------------|-------------------|
| <b>ARGS-AGGRECAN</b> | Serum<br>Synovial fluid | Cartilage turnover           | Cartilage         |
| <b>CTX-II</b>        | Urine                   | Type II collagen degradation | Cartilage<br>Bone |
| <b>CTX-I</b>         | Serum<br>Urine          | Bone turnover                | Bone              |
| <b>COMP</b>          | Serum<br>Synovial fluid | Cartilage degradation        | Cartilage         |
| <b>C2C</b>           | Serum<br>Urine          | Type II collagen degradation | Cartilage         |
| <b>NTX-I</b>         | Serum<br>Urine          | Bone resorption              | Bone              |

### Decision making for choice of treatment and return to sport

Factors affecting the *decision of choice of treatment* (ACLR or not) will be evaluated by the patient, orthopedic surgeon and physiotherapist with questionnaires. Respondents will answer questions about why the particular treatment was chosen, if they perceive it was the right treatment choice, the agreement for choice of treatment between the clinicians and patient, about the patient's involvement and understanding of information, and about the communication between clinicians. The physiotherapist and patient also answer questions about patient rehabilitation.

1  
2  
3 Factors affecting the *decision for return to sports* (RTS) is evaluated at the time the patient  
4 replies that she/he is back to full sports participation of the goal sport/physical activity (with  
5 or without knee problems) based on the response to a question from the OSTRC  
6 questionnaire<sup>33</sup> (“have you had any difficulties participating in your sport activity due to  
7 your knee problems” with the response “full participation without or with knee problems”).  
8 Other questions capture the areas on how the decision for RTS was taken, possible criteria  
9 used to approve RTS, activity and participation modification.  
10  
11  
12  
13  
14  
15  
16  
17

### 18 Primary outcomes and statistical analyses

19 A suite of analyses is planned for each of the 5 main study objectives.  
20

#### 21 Study objective A: assessment of the biological, psychological and social factors, and 22 their relationships to the natural corollaries and recovery after acute ACL injury 23 24 25

##### 26 *Specific aims:*

- 27  
28 1. Assess whether there is a relationship between knee status and self-reported  
29 function early (up to 8 weeks) following ACL injury, and the IKDC-SKF at 3 and 12  
30 months follow-up.  
31  
32
- 33 2. Assess whether there is a relationship between knee status in the first 8 weeks  
34 following injury and functional performance at 12 months follow-up  
35  
36
- 37 3. Evaluate how physical activity, self-reported activity participation or as measured by  
38 activPAL, in the first 8 weeks after ACL injury is related to self-reported function and  
39 functional performance at 3 and 12 months after injury.  
40  
41
- 42 4. Investigate the prognostic relationship between returning to physical activity after  
43 ACL injury, and key biological, psychological and social factors.  
44  
45

46 *Primary outcome:* Self-reported physical activity participation and IKDC subjective knee score  
47 at 12 months follow-up  
48  
49

50 *Secondary outcomes:* functional performance at 3, 6, 12 and 24 months follow-up, time to  
51 return to the goal physical activity  
52  
53

54 *Statistical analysis:* We will use generalised estimating equations (GEE) to assess longitudinal  
55 relationships between knee status and subjective knee function. The outcome variable will  
56  
57  
58  
59

1  
2  
3 be IKDC subjective knee form score. Predictor variables may include knee joint effusion,  
4 laxity and range of motion, and SANE.  
5

6  
7 We will use GEE to assess longitudinal relationships between knee status and functional  
8 performance. The outcome variables will be measures of hopping performance, strength  
9 and postural control. Predictor variables may include knee joint effusion, laxity and range of  
10 motion, and SANE.  
11  
12

13  
14 We will use multilevel modelling to assess relationships between physical activity and knee  
15 status. The outcome variable will be IKDC subjective knee form score. Predictor variables  
16 may include physical activity (self-reported and objectively measured), knee status (knee  
17 joint effusion, laxity and range of motion), age and sex.  
18  
19  
20

21  
22 We will use multilevel modelling to assess the prognostic relationship between returning to  
23 the goal physical activity and biopsychosocial factors. The outcome variable will be time to  
24 return to the goal physical activity. The predictor variables will be different biopsychosocial  
25 factors (collected with questionnaires and clinical examination). We will use factor analysis  
26 to guide which independent variables are entered into the model.  
27  
28  
29  
30

### 31 32 33 Study objective B: evaluation of the choice of treatment after ACL injury 34

#### 35 *Specific aims:* 36

- 37 1. Describe factors that are important for the choice of treatment after an ACL injury,  
38 i.e. ACLR or non-ACLR, from patients, orthopedic surgeons' and physical therapists'  
39 perspective  
40  
41
- 42 2. To confirm the factors identified as important for treatment choice, using  
43 demographic and patient-reported data  
44  
45
- 46 3. Assess the relationship between factors (biological, psychological, social factors and  
47 factors that affected the choice of treatment) and satisfactory knee function (IKDC  
48 subjective knee form) at 12 months  
49  
50
- 51 4. Describe the decision-making process for treatment and evaluate patient satisfaction  
52 with the decision that was made  
53  
54  
55  
56  
57  
58  
59  
60

1  
2  
3 *Primary outcomes:* satisfaction with the treatment choice and the relationship to patient-  
4 reported outcome (IKDC) at 12 months after injury or ACL-R  
5

6  
7 *Secondary outcomes:* factors affecting treatment decision  
8

9  
10 *Statistical analysis:* we will summarise the treatment decision factors reported by patients  
11 and clinicians descriptively using frequency tables. We will confirm whether specific  
12 treatment factors exist for individual patients, by matching the patient's own demographic  
13 and/or patient-reported data to the relevant factor.  
14  
15

16  
17 We will use factor analysis to determine the common constructs underlying the factors that  
18 are important for the choice of treatment. The smaller number of related groups of factors  
19 will be used in a subsequent multivariable model. We will run separate analyses for the  
20 factors cited as important for the decision for ACLR and the factors cited as important for the  
21 decision for non-ACLR.  
22  
23

24  
25 Finally, we will use a multilevel model to estimate the relationship between biopsychosocial  
26 factors and self-reported knee function at 12 months. The outcome variable will be IKDC  
27 subjective knee form score at 12 months. The predictor variables may include clusters of  
28 biopsychosocial factors (identified in A - Assessment of the biological, psychological and  
29 social factors, and their relationships to the natural corollaries and recovery after acute ACL  
30 injury) and treatment choice clusters (independent variables). The model will be adjusted for  
31 treatment received (i.e. ACLR or non-ACLR).  
32  
33  
34  
35  
36  
37  
38  
39

#### 40 **Study objective C: evaluation of return to sport after ACL injury**

##### 41 *Specific aims:*

- 42 1. Describe the decision-making process for return to sport following ACL injury
- 43 2. Describe the criteria physiotherapists use in clinical practice to clear patients to  
44 return to sport after ACL injury
- 45 3. Validate the criteria used to clear patients to return to sport after ACL injury

46  
47  
48  
49  
50  
51 *Primary outcome:* return to sport rate at 24 months follow-up  
52

53  
54 *Secondary outcomes:* time to return to sport, sports participation rates over time, incidence  
55 of new knee injuries  
56  
57

1  
2  
3 Statistical analysis: we will summarise the return to sport decision factors reported by  
4 patients and clinicians descriptively using frequency tables. We will also summarise the  
5 criteria used by clinicians to decide when the patient was ready to return to sport  
6 descriptively using frequency tables. To assess the discriminant validity of the criteria used  
7 to clear patients to return to sport after ACL injury, we will use regression analyses to  
8 compare relevant outcomes (e.g. strength, effusion, range of motion) between participants  
9 who do and do not return to sport.  
10  
11  
12  
13  
14  
15  
16  
17

#### 18 Study objective D: knee problems in the short- and long-term after acute ACL injury

##### 19 *Specific aim:*

- 21 1. Describe the rate and nature of knee problems (new acute knee injury, gradual onset  
22 knee injury and osteoarthritis) after index ACL injury
- 23 2. Assess whether there is a relationship between biological, psychological and social  
24 factors, and new knee problems after acute ACL injury  
25  
26  
27  
28

29 Primary outcome: new acute knee injury

30  
31 Secondary outcomes: gradual onset knee injury, osteoarthritis

32  
33  
34 Statistical analysis: we will use a time-to-event analysis to estimate the rate of new acute  
35 knee injuries (may include new ACL tears, new meniscus tears), the rate of radiographic  
36 osteoarthritis and the rate of symptomatic osteoarthritis. The predictor variables may  
37 include treatment (ACLR or non-ACLR), sex, age and clusters of biopsychosocial factors  
38 (identified in A - Assessment of the biological, psychological and social factors, and their  
39 relationships to the natural corollaries and recovery after acute ACL injury).  
40  
41  
42  
43  
44

45 We will use a multi-level modeling approach to assess whether there is a relationship  
46 between biopsychosocial factors and gradual onset knee injuries. The independent variables  
47 may include clusters of biopsychosocial factors (identified in "Assessment of the biological,  
48 psychological and social factors, and their relationships to the natural corollaries and  
49 recovery after acute ACL injury"), treatment, sex and age.  
50  
51  
52  
53  
54  
55  
56  
57  
58  
59  
60

## Study objective E: identification of proxies for early detection of osteoarthritis

### *Specific aims*

1. Identify imaging-based proxies of early radiographic and symptomatic osteoarthritis
2. Identify change in specific local and/or systemic molecular biomarkers (biological proxies) and investigate their relation to imaging based structural change and patient relevant outcomes
3. Investigate the temporal relation between symptoms, structure and biology after knee injury

*Primary outcome:* radiographic osteoarthritis at 5-years follow-up

*Secondary outcomes:* MR-defined at 2-years follow-up; symptoms as defined by IKDC subjective knee form and SANE at 2- and 5-years follow-up

*Statistical analysis:* We will use a multi-level modelling approach to relate predictor variables that may include imaging-based and biologically-based proxies, and possible risk factors (e.g. treatment (ACLR or non-ACLR), meniscus injury, activity participation) to the primary and secondary outcomes. We will adjust for potential confounders that may include sex, age, and body mass index.

### Sample size calculation

For regression analysis in the different parts, using approximately 10 independent variables for each outcome, at least 130 participants will be included. For part B and C, evaluating decision for treatment and RTS, we need geographically spread collected data in order to be generalisable. Since there might be different routines and common praxis among different clinics even in the same geographical area, it is important to include different clinics when collecting data. We are collecting data from seven different counties, and several clinics within these counties, spreading from south to north of Sweden. We expect to collect data regarding decision making from at least about 25 orthopedic surgeons (about 10% of all surgeons performing ACL reconstructions over Sweden) and at least 45 physiotherapists (there is no registry for the number of physiotherapists treating ACL injured patients in Sweden).

## Timeline

Patient recruitment started in October 2016 and will continue until June 2018.

## Ethics and dissemination

Being included in this study will not influence which treatment the patient will receive. The study is approved by the regional Ethical committee in Linköping, Sweden (Dnr 2016/44-31 and 2017/221-32).

Results will be presented at national and international conferences and submitted for publication to peer-reviewed journals. Participants will receive short summary of the study.

## References

1. Frobell RB, Lohmander LS, Roos HP. Acute rotational trauma to the knee: poor agreement between clinical assessment and magnetic resonance imaging findings. *Scand J Med Sci Sports* 2007;**17**:109-14.
2. Grindem H, Eitzen I, Engebretsen L, et al. Nonsurgical or surgical treatment of ACL injuries: knee function, sports participation, and knee reinjury: the Delaware-Oslo ACL Cohort Study. *J Bone Joint Surg Am* 2014;**96**:1233-41.
3. Lohmander LS, Englund PM, Dahl LL, et al. The long-term consequence of anterior cruciate ligament and meniscus injuries: osteoarthritis. *Am J Sports Med* 2007;**35**:1756-69.
4. Ajuied A, Wong F, Smith C, et al. Anterior cruciate ligament injury and radiologic progression of knee osteoarthritis: a systematic review and meta-analysis. *Am J Sports Med* 2013;**42**:2242-52.
5. Sanders TL, Kremers HM, Bryan AJ, et al. Is anterior cruciate ligament reconstruction effective in preventing secondary meniscal tears and osteoarthritis? *Am J Sports Med* 2016;**44**:1699-707.
6. Frobell RB, Roos HP, Roos EM, et al. Treatment for acute anterior cruciate ligament tear: five year outcome of randomised trial. *BMJ* 2013;**346**:f232.
7. Grindem H, Eitzen I, Moksnes H, et al. A pair-matched comparison of return to pivoting sports at 1 year in anterior cruciate ligament-injured patients after a nonoperative versus an operative treatment course. *Am J Sports Med* 2012;**40**:2509-16.
8. Österberg A, Kvist J, Dahlgren MA. Ways of experiencing participation and factors affecting the activity level after nonreconstructed anterior cruciate ligament injury: a qualitative study. *J Orthop Sports Phys Ther* 2013;**43**:172-83.
9. Ardern C, Kvist J, Webster K. Psychological aspects of anterior cruciate ligament injuries. *Operative Techniques in Sports Medicine* 2016;**24**:77-83.
10. Chalmers PN, Mall NA, Moric M, et al. Does ACL reconstruction alter natural history?: A systematic literature review of long-term outcomes. *J Bone Joint Surg Am* 2014;**96**:292-300.

11. Nordenvall R, Bahmanyar S, Adami J, et al. Cruciate ligament reconstruction and risk of knee osteoarthritis: the association between cruciate ligament injury and post-traumatic osteoarthritis. a population based nationwide study in Sweden, 1987-2009. *PLoS One* 2014;**9**:e104681.
12. Øiestad BE, Engebretsen L, Storheim K, et al. Knee osteoarthritis after anterior cruciate ligament injury: a systematic review. *Am J Sports Med* 2009;**37**:1434-43.
13. Larsson S, Struglics A, Lohmander LS, et al. Surgical reconstruction of ruptured anterior cruciate ligament prolongs trauma-induced increase of inflammatory cytokines in synovial fluid: an exploratory analysis in the KANON trial. *Osteoarthritis Cartilage* 2017;**25**:1443-51.
14. Davis JC, Bryan S. Patient Reported Outcome Measures (PROMs) have arrived in sports and exercise medicine: Why do they matter? *Br J Sports Med* 2015;**49**:1545-6.
15. Graham B, Green A, James M, et al. Measuring patient satisfaction in orthopaedic surgery. *J Bone Joint Surg Am* 2015;**97**:80-4.
16. Ardern CL, Österberg A, Sonesson S, et al. Satisfaction with knee function after primary anterior cruciate ligament reconstruction is associated with self-efficacy, quality of life, and returning to the preinjury physical activity. *Arthroscopy* 2016;**32**:1631-38.
17. Engstrand C, Kvist J, Krevers B. Patients' perspective on surgical intervention for Dupuytren's disease - experiences, expectations and appraisal of results. *Disabil Rehabil* 2016;**38**:2538-49.
18. Sonesson S, Kvist J, Ardern C, et al. Psychological factors are important to return to pre-injury sport activity after anterior cruciate ligament reconstruction: expect and motivate to satisfy. *Knee Surg Sports Traumatol Arthrosc* 2017;**25**:1375-84.
19. Lynch AD, Løgerstedt DS, Grindem H, et al. Consensus criteria for defining 'successful outcome' after ACL injury and reconstruction: a Delaware-Oslo ACL cohort investigation. *Br J Sports Med* 2015;**49**:335-42.
20. Filbay SR, Roos EM, Frobell RB, et al. Delaying ACL reconstruction and treating with exercise therapy alone may alter prognostic factors for 5-year outcome: an exploratory analysis of the KANON trial. *Br J Sports Med* 2017 doi: 10.1136/bjsports-2016-097124.
21. Ahlden M, Kvist J, Samuelsson K, et al. [Individualized therapy is important in anterior cruciate ligament injuries]. *Lakartidningen* 2014;**111**:1440-3.
22. Tigerstrand Grevnerts H, Gravare Silbernagel K, Sonesson S, et al. Translation and testing of measurement properties of the Swedish version of the IKDC subjective knee form. *Scand J Med Sci Sports* 2017;**27**:554-62.
23. Shelbourne KD, Barnes AF, Gray T. Correlation of a single assessment numeric evaluation (SANE) rating with modified Cincinnati knee rating system and IKDC subjective total scores for patients after ACL reconstruction or knee arthroscopy. *Am J Sports Med* 2012;**40**:2487-91.
24. Roos EM, Roos HP, Ekdahl C, et al. Knee injury and Osteoarthritis Outcome Score (KOOS)-- validation of a Swedish version. *Scand J Med Sci Sports* 1998;**8**:439-48.
25. Grindem H, Eitzen I, Snyder-Mackler L, et al. Online registration of monthly sports participation after anterior cruciate ligament injury: a reliability and validity study. *Br J Sports Med* 2014;**48**:748-53.
26. Love J, Moore CD, Hensing G. Validation of the Swedish translation of the General Self-Efficacy scale. *Qual Life Res* 2012;**21**:1249-53.
27. Thomee P, Wahrborg P, Borjesson M, et al. A new instrument for measuring self-efficacy in patients with an anterior cruciate ligament injury. *Scand J Med Sci Sports* 2006;**16**:181-7.
28. Kvist J, Österberg A, Gauffin H, et al. Translation and measurement properties of the Swedish version of ACL-Return to Sports after Injury questionnaire. *Scand J Med Sci Sports* 2013;**23**:568-75.



- 1  
2  
3 29. Cherkin DC, Deyo RA, Street JH, et al. Predicting poor outcomes for back pain seen in primary  
4 care using patients' own criteria. *Spine (Phila Pa 1976)* 1996;**21**:2900-7.
- 5 30. Mohtadi N. Development and validation of the quality of life outcome measure (questionnaire)  
6 for chronic anterior cruciate ligament deficiency. *Am J Sports Med* 1998;**26**:350-9.
- 7 31. Kolt GS, Brewer BW, Pizzari T, et al. The Sport Injury Rehabilitation Adherence Scale: a reliable  
8 scale for use in clinical physiotherapy. *Physiotherapy* 2007;**93**:17-22.
- 9 32. Fältström A, Hägglund M, Kvist J. Factors associated with playing football after anterior cruciate  
10 ligament reconstruction in female football players. *Scand J Med Sci Sports* 2016;**26**:1343-52.
- 11 33. Clarsen B, Myklebust G, Bahr R. Development and validation of a new method for the registration  
12 of overuse injuries in sports injury epidemiology: the Oslo Sports Trauma Research Centre  
13 (OSTRC) overuse injury questionnaire. *Br J Sports Med* 2013;**47**:495-502.
- 14 34. Sturgill LP, Snyder-Mackler L, Manal TJ, et al. Interrater reliability of a clinical scale to assess knee  
15 joint effusion. *J Orthop Sports Phys Ther* 2009;**39**:845-9.
- 16 35. Reid A, Birmingham TB, Stratford PW, et al. Hop testing provides a reliable and valid outcome  
17 measure during rehabilitation after anterior cruciate ligament reconstruction. *Phys Ther*  
18 2007;**87**:337-49.
- 19 36. Brandt KD, Mazzuca SA, Conrozier T, et al. Which is the best radiographic protocol for a clinical  
20 trial of a structure modifying drug in patients with knee osteoarthritis? *J Rheumatol*  
21 2002;**29**:1308-20.
- 22 37. Boegard TL, Rudling O, Petersson IF, et al. Joint space width of the tibiofemoral and of the  
23 patellofemoral joint in chronic knee pain with or without radiographic osteoarthritis: a 2-year  
24 follow-up. *Osteoarthritis Cartilage* 2003;**11**:370-6.
- 25 38. Warntjes JB, Leinhard OD, West J, et al. Rapid magnetic resonance quantification on the brain:  
26 Optimization for clinical usage. *Magn Reson Med* 2008;**60**:320-9.
- 27  
28  
29  
30  
31  
32  
33  
34  
35

### Authors' contributions:

36 JK wrote the first draft and coordinated the preparation of the protocol together with CA. HG, HTG,  
37 MH, AS and RF were responsible for different parts of the protocol writing. All authors revised and  
38 accepted the final manuscript of the protocol.  
39  
40  
41  
42  
43

### Funding statement

44 This work is supported by the Swedish Medical Research Council (VR 2015-03687), the Swedish  
45 Research Council for Sport Science (CIF P2016-0063 and P2017-0151), the Medical Research Council  
46 of Southeast Sweden FORSS (FORSS -662081) and the Medical Faculty at Linköping University,  
47 Sweden.  
48  
49  
50  
51  
52  
53  
54  
55  
56  
57  
58  
59  
60

## Acknowledgement

The NACOX Cohort study group involves the authors named on this paper and the following collaborators:

- Anna Fahlgren, Associate Professor, Experimental Orthopaedics, Department of Clinical and Experimental Medicine, Linköping University, Sweden
- Anne Fältström, Physiotherapist, PhD, Region Jönköping County, Rehabilitation Centre, Ryhov County Hospital, Jönköping
- Johan Kihlberg, Radiograph, Center for Medical Image Science and Visualization (CMIV), Department of Medical and Health Sciences, Linköping University, Sweden
- Barbro Krevers, Associate Professor, Division of Health Care Analysis, Department of Medical and Health Sciences, Linköping University, Sweden
- Maria Lindblom, MD Center for Medical Image Science and Visualization (CMIV), Department of Radiology, Linköping University, Sweden
- Per Magnusson, Adjunct Professor, Clinical Chemistry, Department of Clinical and Experimental Medicine, Linköping University, Sweden
- Anders Persson, Professor, Center for Medical Image Science and Visualization (CMIV), Department of Medical and Health Sciences, Linköping University, Sweden

## Competing interests statement

None declared

# BMJ Open

## Natural corollaries and recovery after acute ACL injury – the NACOX cohort study protocol

|                                 |                                                                                                                                                                                                                                                                                                                                                                                                                                                                                                                                                                                                                                        |
|---------------------------------|----------------------------------------------------------------------------------------------------------------------------------------------------------------------------------------------------------------------------------------------------------------------------------------------------------------------------------------------------------------------------------------------------------------------------------------------------------------------------------------------------------------------------------------------------------------------------------------------------------------------------------------|
| Journal:                        | <i>BMJ Open</i>                                                                                                                                                                                                                                                                                                                                                                                                                                                                                                                                                                                                                        |
| Manuscript ID                   | bmjopen-2017-020543.R1                                                                                                                                                                                                                                                                                                                                                                                                                                                                                                                                                                                                                 |
| Article Type:                   | Protocol                                                                                                                                                                                                                                                                                                                                                                                                                                                                                                                                                                                                                               |
| Date Submitted by the Author:   | 15-Mar-2018                                                                                                                                                                                                                                                                                                                                                                                                                                                                                                                                                                                                                            |
| Complete List of Authors:       | Kvist, Joanna; Medical and Health Sciences, Physiotherapy; Neurobiology, Care Sciences and Socie, Division of Physiotherapy<br>Gauffin, Håkan; Department of Clinical and Experimental Medicine<br>Tigerstrand Grevnerts, Hanna; Department of Medical and Health Sciences, Division of Physiotherapy<br>Ardern, CL; Linköping University, Division of Physiotherapy<br>Hagglund, Martin; Department of Medical and Health Sciences, Division of Physiotherapy<br>Stålman, Anders; Capio ArthroClinic, Stockholm Sports Trauma Research Center, Sophiahemmet<br>Frobell, Richard; Lund University, Orthopedics, Clinical Sciences Lund |
| <b>Primary Subject Heading</b>: | Sports and exercise medicine                                                                                                                                                                                                                                                                                                                                                                                                                                                                                                                                                                                                           |
| Secondary Subject Heading:      | Rehabilitation medicine                                                                                                                                                                                                                                                                                                                                                                                                                                                                                                                                                                                                                |
| Keywords:                       | Knee < ORTHOPAEDIC & TRAUMA SURGERY, Musculoskeletal disorders < ORTHOPAEDIC & TRAUMA SURGERY, Magnetic resonance imaging < RADIOLOGY & IMAGING, SPORTS MEDICINE, Orthopaedic & trauma surgery < SURGERY                                                                                                                                                                                                                                                                                                                                                                                                                               |
|                                 |                                                                                                                                                                                                                                                                                                                                                                                                                                                                                                                                                                                                                                        |

SCHOLARONE™  
Manuscripts

## Study protocol

Natural corollaries and recovery after acute ACL injury – the NACOX cohort study protocol

J Kvist, H Gauffin, H Tigerstrand Grevnerts, C Ardern, M Hägglund, A Stålmán, R Frobell

### Contact information:

#### Principal investigator:

Joanna Kvist, physiotherapist,  
Professor, Division of Physiotherapy, Department of Medical and Health Sciences, Linköping University, Sweden;  
Center for Medical Image Science and Visualization (CMIV), Department of Medical and Health Sciences, Linköping University, Sweden;  
Division of Physiotherapy, Department of Neurobiology, Care Sciences and Society, Karolinska Institutet, Stockholm, Sweden;  
joanna.kvist@liu.se, Tel +46 732 713077

#### Co-investigators:

- Håkan Gauffin, MD, PhD, Department of Orthopaedics, Linköping University, Linköping, Sweden
- Hanna Tigerstrand Grevnerts, physiotherapist, PhD student, Division of Physiotherapy, Department of Medical and Health Sciences, Linköping University, Sweden
- Richard Frobell, PhD, Associate Professor, Orthopedics, Clinical Sciences Lund, Lund University, Sweden
- Clare Ardern, physiotherapist, post-doctoral researcher, Division of Physiotherapy, Department of Medical and Health Sciences, Linköping University, Sweden; School of Allied Health, La Trobe University, Melbourne, Australia
- Martin Hägglund, physiotherapist, Associate Professor, Division of Physiotherapy, Department of Medical and Health Sciences, Linköping University, Sweden
- Anders Stålmán, MD PhD, Capio ArtroClinic, Stockholm Sports Trauma Research Center, Sophiahemmet, Stockholm

#### Collaborators:

- Michael A Bowes, Sr Director Clinical Applications, Imorphics Ltd, Manchester, UK
- Victor Casula, PhD, Research Unit of Medical Imaging, Physics and Technology, University of Oulu, Finland
- Anna Fahlgren, Associate Professor, Experimentell Ortopedi, Department of Clinical and Experimental Medicine, Linköping University, Sweden
- Anne Fältström, Physiotherapist, PhD, Region Jönköping County, Rehabilitation Centre, Ryhov County Hospital, Jönköping

- Johan Kihlberg, Radiograph, Center for Medical Image Science and Visualization (CMIV), Department of Medical and Health Sciences, Linköping University, Sweden
- Barbro Krevers, Associate Professor, Division of Health Care Analysis, Department of Medical and Health Sciences, Linköping University, Sweden
- Maria Lindblom, MD Center for Medical Image Science and Visualization (CMIV), Department of Radiology, Linköping University, Sweden
- Per Magnusson, Adjunct Professor, Clinical Chemistry, Department of Clinical and Experimental Medicine, Linköping University, Sweden
- Miika Nieminen, Professor, Research Unit of Medical Imaging, Physics and Technology, University of Oulu, Finland; Department of Diagnostic Radiology, Oulu University Hospital, Finland
- Anders Persson, Professor, Center for Medical Image Science and Visualization (CMIV), Department of Medical and Health Sciences, Linköping University, Sweden

## ABSTRACT

### Introduction

Anterior cruciate ligament (ACL) injury can result in joint instability, decreased functional performance, reduced physical activity and quality of life, and an increased risk for post-traumatic osteoarthritis. Despite the development of new treatment techniques and extensive research, the complex and multifaceted nature of ACL injury and its consequences are yet to be fully understood. The overall aim of the NACOX study is to evaluate the natural corollaries and recovery after an ACL injury.

### Methods and analysis

The NACOX study is a multi-centre prospective prognostic cohort study of patients with acute ACL injury. At 7 sites in Sweden, we will include patients aged 15-40 years, within 6 weeks after primary ACL injury. Patients will complete questionnaires at multiple occasions over the 3 years following injury or the 3 years following ACL reconstruction (for participants who have surgical treatment). In addition, a subgroup of 130 patients will be followed with clinical examinations, several imaging modalities, and biological samples. Data analyses will be specific to each aim.

### Ethics and dissemination

This study has been approved by the regional Ethical committee in Linköping, Sweden (Dnr 2016/44-31 and 2017/221-32). We plan to present the results at national and international conferences, and in peer-reviewed scientific journals. Participants will receive a short summary of the results following completion of the study.

*Trial registration:* NCT02931084

### Strengths and limitations of this study

- The prospective observational design with frequently-monitored biological, psychological and social variables allows analysis of outcomes at key, clinically-relevant time points after injury.
- Quantitative methods are used to assess the perspectives of important stakeholders in acute ACL injury management (patients and clinicians (orthopaedic surgeons and physiotherapists)).
- The utilisation of advanced imaging techniques and collection of biological samples for identification of proxies of early osteoarthritis that can be related to prospectively collected patient-reported outcome measures and clinical data.
- Loss to follow-up and missing data may be a risk due to the extensive collection of patient-reported outcomes. However, we have a dedicated study monitoring team, and a rigorous data analysis plan to appropriately deal with missing data.

## INTRODUCTION

Anterior cruciate ligament (ACL) injuries are common in young athletes. In Sweden, there are approximately 7000 new injuries per year representing approximately 0.81/1000 inhabitants aged 10-64 years.<sup>1</sup> Despite the extensive research to identify the best treatment algorithms, there are still many patients who report unsatisfactory outcomes regarding knee stability, activity level and quality of life following ACL injury.<sup>2,3</sup> This may be because research has tended to focus on single factors, rather than accounting for the multifactorial nature of injury and recovery. There is also a clinical dogma that ACL reconstruction is necessary for a successful outcome after ACL injury and to resume sporting activities.<sup>4,5</sup> Although there is evidence that some patients have functional disability fulfilling the clinical indications for ACL reconstruction,<sup>6</sup> with high quality rehabilitation, many patients achieve satisfactory knee function and participation in sports without surgery.<sup>7,8</sup>

An ACL injury has biological, psychological and social corollaries,<sup>9</sup> that directly affect the patient (e.g. impaired quality of life and lower physical activity participation), and may affect the community (e.g. increased health utilisation costs, impaired productivity, potential for increased chronic disease burden through flow-on development of non-communicable diseases associated with physical inactivity such as cardiovascular disease and diabetes). Taking a biopsychosocial approach, factors including the extent of the initial injury (e.g. whether there were other knee structures involved), factors directly related to the treatment (e.g. which intervention and when), and patient preferences, expectations and past experiences may all be relevant when assessing outcomes.

The most serious long-term corollary after ACL injury is the increased risk for post-traumatic osteoarthritis, estimated to be up to 50% by 15 years after injury.<sup>3</sup> This risk of developing osteoarthritis is higher if the ACL injury is associated with a meniscus tear, and there are conflicting results regarding whether having ACL reconstruction reduces or increases the risk of osteoarthritis.<sup>4,5,10-12</sup> The underlying mechanisms behind the development of osteoarthritis are not well understood. Altered biological processes due to injury and joint bleeding, concomitant structural injuries to the cartilage and the subchondral bone, and joint instability and subsequent altered biomechanics, may be relevant for the development of osteoarthritis. Secondary joint trauma (e.g. with additional meniscal tears, or ACL reconstruction<sup>13</sup>) may also influence the risk for osteoarthritis.

1  
2  
3 Outcomes need to be evaluated from both the patient's and the clinician's perspective.  
4 Patient-reported outcomes provide important insights into aspects of injury and recovery  
5 that cannot otherwise be observed or measured with clinical tests or imaging.<sup>14</sup> Clinical  
6 outcomes provide the clinician (and by extension – in a well applied shared decision-making  
7 approach – the patient) with feedback regarding the effects of different clinical decisions on  
8 injury (i.e. which treatment and when), and any physical changes that occur following a  
9 clinical decision (e.g. change in effusion and muscle strength, incidence of new injuries,  
10 development of osteoarthritis).  
11  
12

13  
14  
15  
16  
17 The short-term aim of ACL injury management is to achieve satisfactory knee function and  
18 physical activity participation. In the long-term, treatment should aim to reduce the risk of  
19 developing osteoarthritis. Satisfaction is complex and short-term success (e.g. returning to  
20 pivoting sports) may facilitate longer term failure (e.g. developing osteoarthritis after  
21 sustaining a second or third meniscal injury). From the patient's perspective, satisfaction can  
22 relate to both the outcome of management of the injury (including knee function,  
23 confidence to participate in physical activity, fulfillment of expectations for recovery), and to  
24 the process of health care delivery (including being an active participant in the decision  
25 making process, communication with clinicians, information about the injury and  
26 treatment).<sup>15-18</sup> The clinician needs to monitor the resolution of impairments (knee stability,  
27 symmetrical lower limb muscle strength, absence of knee effusion), to ensure that  
28 treatment is tailored so that the patient has the physical capacity to reach his or her  
29 expectations (e.g. return to sport, return to occupation).<sup>19</sup> However, it is evident that these  
30 criteria cover only some of the spectrum of possible corollaries of ACL injury.  
31  
32

33  
34  
35  
36  
37  
38  
39  
40  
41  
42 There is evidence that treatment after ACL injury needs to be individualised.<sup>20</sup> The clinician  
43 needs to be able to account for and (ideally) address the important biological, psychological  
44 and social factors for each patient. However, we still lack evidence regarding which factors,  
45 for which patient, at which time; and this poses challenges for clinical practice. Therefore, to  
46 enhance understanding of the consequences of ACL injury, and improve treatment, the  
47 overall aim of the NACOX study is to investigate the natural corollaries and recovery after  
48 ACL injury. Understanding the complexity of the consequences of ACL injury may improve  
49 clinical decision-making to ensure best health care for patients.  
50  
51

52  
53  
54  
55  
56 To achieve the overall aim, there are five main study objectives:  
57  
58



- A. To assess biological, psychological and social factors and their relationships to the natural corollaries and recovery after acute ACL injury
- B. To evaluate the choice of treatment after acute ACL-injury (i.e. ACL reconstruction, ACLR or non-ACL reconstruction, non-ACLR)
- C. To evaluate the return to sport after acute ACL injury
- D. To study knee problems in the short and long term after acute ACL-injury
- E. To identify proxies (biomarkers and structural risk factors) for early detection of symptomatic and radiographic osteoarthritis

## METHODS AND ANALYSIS

This study is a prospective multicenter prognostic cohort study. Patients will be consecutively recruited over approximately 20 months, from up to seven sites (mix of public and private health care clinics) in Sweden.

### Inclusion and exclusion criteria

All patients with acute knee trauma presenting to the identified clinics are potentially eligible for participation.

Inclusion criteria: Patients with an ACL injury, sustained no more than 6 weeks prior to presentation, and aged between 15 and 40 years at time of ACL injury.

Exclusion criteria: previous ACL injury/ACL reconstruction on the same knee, serious concomitant knee injury (e.g. posterior cruciate ligament rupture, fracture that requires separate treatment), inability to understand written and spoken Swedish language, cognitive impairments, other illness or injury that impairs function (e.g. fibromyalgia, rheumatic diseases and other diagnoses associated with chronic pain).

### Procedure

Recruitment of participants started in October 2016, and this study does not alter the usual course of treatment for patients with ACL injury at recruiting centres. This process is:

1. Patient receives a clinical diagnosis from an orthopedic surgeon, verified by MRI, within 2-6 weeks after their knee injury.

- 2
- 3 2. Initial treatment according to a supervised rehabilitation program of approximately
- 4 three months duration.<sup>21</sup>
- 5
- 6 3. Scheduled follow-up after approximately 3 months, where further treatment is
- 7 decided upon between patient and orthopaedic surgeon.
- 8
- 9

10 Consequently, patients of this cohort will follow one of the two following pathways: (1) ACLR

11 plus post-operative supervised rehabilitation and (2) supervised rehabilitation alone (non-

12 ACLR).

13

14

15

16 Patients are asked to participate in the study at their initial contact with the health care

17 provider. Patients who accept participation will be sent questionnaires via smart phone or e-

18 mail. Questionnaires will be sent weekly for the first 6 weeks, fortnightly from week 7 to

19 week 24, monthly from month 7 to month 12, and bi-monthly from year 1 to year 3 after

20 initial injury. Questionnaire length varies from very short (10 questions, approximately 2 min

21 completion time) to longer at specific critical time points (Figure 1 and Table 1).

22

23

24

25

26

27 A questionnaire about treatment choice (ACLR or non-ACLR) is completed by the patient,

28 orthopedic surgeon and physiotherapist at the time the decision for ACLR or non-ACLR is

29 made. A questionnaire about the decision to return to sport is completed by the patient and

30 the physiotherapist when the patient reports that he/she is back to full participation in the

31 goal sports/physical activity. For patients with ACLR, a new baseline questionnaire will be

32 completed at the time of reconstruction. Subsequent data collection will continue according

33 to the new baseline time point (Figure 1).

34

35

36

37

38

39

40 One subgroup (approximately 130 patients recruited from Linköping) will have extended

41 follow-up data collection at baseline and 3, 6, 12 and 24 months after injury. At these time

42 points, a clinical examination will be completed by a physiotherapist, physical activity will be

43 registered over 5 consecutive days using a triaxial accelerometer (activPAL™,

44 PALtechnologies, UK), knee MRI will be performed, and blood and urine samples will be

45 collected. A joint fluid sample is acquired at baseline if indicated due to joint effusion, and at

46 the time of any additional surgery including ACLR (if the patient has surgical treatment).

47

48

49

50

51

52

53

54

55

56

57

58

59

60

1  
2  
3 time of reconstruction. MRIs and blood and urine samples are followed up with the injury  
4 according to the index baseline (Figure 1).  
5

6  
7 *Figure 1 about here*  
8

## 9 Outcomes

10 Reflecting a biopsychosocial approach, outcome measurement for this study will evaluate  
11 four main aspects: patient-reported outcomes, physical function, physical activity and  
12 physiological markers of joint injury (Figure 1).  
13  
14  
15

### 16 Patient-reported outcomes: all study participants

17  
18 Demographic and baseline characteristics including age, sex, BMI, smoking habits,  
19 occupation, preinjury activity level, medical and injury history, sick leave, preferences  
20 regarding treatment will be collected with the baseline questionnaire (Figure 2).  
21  
22  
23  
24  
25

26  
27 Patient-reported *knee function and participation* will be assessed with the International  
28 Knee Documentation Committee Subjective Knee Form (IKDC-SKF),<sup>22</sup> a Single Assessment  
29 Numeric Evaluation (SANE) of global knee function,<sup>23</sup> and the four subscales of Knee injury  
30 and Osteoarthritis Outcome Score (Pain, other Symptoms, Function in sport and recreation  
31 (sport/rec) and knee-related quality of life (QOL); KOOS<sub>4</sub>).<sup>24</sup> Subjective *knee stability* during  
32 ADL and sports will each be assessed with a single numeric rating scale (1-10 scale) (Figure  
33 2).  
34  
35  
36  
37  
38  
39

40 The frequency of self-reported participation in *physical activity* will be collected according to  
41 the recommendations from Swedish National Board of Welfare. Participants will report the  
42 type of physical activity they participated in (e.g. football, strength training), and the level of  
43 participation (e.g. recreational, elite), during the previous week. Participation in up to 3  
44 activities can be recorded (Figure 2).<sup>25</sup>  
45  
46  
47  
48  
49

50 *Expectations* for recovery (2 questions) and fulfillment of expectations (1 question) will be  
51 assessed using 6-item Likert scales. Participants will be asked to indicate if their goal was to  
52 return to sport and reasons for not returning. *Motivation* to return to the preinjury physical  
53  
54  
55  
56  
57  
58  
59  
60

1  
2  
3 activity will be evaluated using a questionnaire we developed based on the transtheoretical  
4 model of behavior change (Figure 2).<sup>18</sup>  
5  
6

7 The General *Self Efficacy* scale (GSES) will be used at baseline to assess the individual's  
8 beliefs that his/her actions determine successful outcome.<sup>26</sup> Knee-specific self-efficacy will  
9 be assessed with the subscale of the Knee Self Efficacy Scale (K-SES) that evaluates patients'  
10 perception of future knee function (4 questions).<sup>27</sup> *Psychological readiness* for return to  
11 sport will be assessed with the ACL-Return to Sport after Injury (ACL-RSI) questionnaire that  
12 includes questions on confidence in performance, emotions and risk appraisal.<sup>28</sup> *Satisfaction*  
13 with present knee function will be evaluated with a 7-item Likert scale ranging from  
14 "delighted" to "terrible".<sup>29</sup> Knee-related quality of life (QoL) will be assessed with the ACL-  
15 QoL questionnaire and KOOS QOL (Figure 2).<sup>30</sup>  
16  
17  
18  
19  
20  
21  
22

23  
24 Participants will be asked to indicate the *number of rehabilitation sessions* they have  
25 completed. *Adherence* to rehabilitation will be assessed by the patient and physiotherapist  
26 with the Sports Injury Rehabilitation Adherence Scale.<sup>31</sup> The importance of rehabilitation for  
27 the current knee function will be assessed on a 5-response scale ranging from "necessary for  
28 my current knee function" to "not necessary at all"<sup>32</sup>. Experience with health care will be  
29 assessed with a 5-item Likert scale ranging from "very good" to "very bad" (Figure 2).  
30  
31  
32  
33  
34

35 Information about *new knee injuries* will be collected using a direct question, which is  
36 followed up with phone call if the injury is severe, i.e. results in functional limitation during  
37 the following days or inability to participate in physical activity. *Knee problems during*  
38 *physical activity participation* will be assessed with the knee-specific part of the Oslo Sports  
39 Trauma Research Centre (OSTRC) questionnaire (Figure 2).<sup>33</sup>  
40  
41  
42  
43  
44

45 *Figure 2 about here.*  
46  
47

#### 48 Clinical examination: sub-group of study participants 49

50 The sub-group of participants recruited from one of the study sites (Linköping) will have  
51 clinical examinations of knee function, performed by either an orthopedic surgeon together  
52 with a physiotherapist (always for the baseline assessment), or physiotherapist alone, or  
53  
54  
55  
56  
57  
58  
59  
60

1  
2  
3 physiotherapy student in the final year of education. All assessors will have standardised  
4 training in the clinical examination procedure.  
5

6  
7 *Knee status* will be assessed using knee joint effusion (circumference of the joint using a  
8 measurement tape, and the 'stroke test'<sup>34</sup>), knee joint laxity tests (Lachman test, Lever sign,  
9 anterior drawer and medial/lateral laxity), knee flexion and extension and ankle dorsiflexion  
10 range of motion, varus or valgus knee alignment. Instrumented knee laxity measurements  
11 will be assessed using the KT-1000 arthrometer at 133N and manual maximum (mean value  
12 of three repetitions).  
13

14  
15 *Functional performance* will be evaluated through qualitative assessment of gait (10m  
16 walking test), single leg squat, and four single-limb hop tests (single hop for distance, triple  
17 hop, crossover hop and 6-meter timed-hop).<sup>35</sup> *Postural control* will be assessed using a  
18 single-limb static balance task with eyes closed (SOLEC). Concentric quadriceps and  
19 hamstrings *strength* will be assessed using a Biodex dynamometer, at 60 degrees/second (5  
20 repetitions) and 180 degrees/second (15 repetitions) angular velocities.  
21  
22  
23  
24  
25  
26  
27  
28  
29  
30

### 31 Activity registration: sub-group of study participants

32  
33  
34 At the conclusion of the clinical examination, participants will be asked to wear a triaxial  
35 accelerometer (activPAL™ micro, PAL Technologies Ltd.) for a minimum of 5 days (maximum  
36 7 days) immediately following the examination. The accelerometer will be attached mid-way  
37 between the hip and the injured knee according to the manufacturer's recommendations.  
38  
39  
40  
41  
42  
43  
44

### 45 Imaging: sub-group of study participants

46 Patients recruited in Linköping (approximately 130 patients) will undergo extensive imaging  
47 assessment and collection of biosamples.  
48  
49

50 Plain weight bearing *radiographs* – the current gold standard for assessment of radiographic  
51 osteoarthritis – will be obtained using a slightly modified method of the Lyon-Schuss view  
52 (participants stand, bearing equal weight through each limb<sup>36</sup>) and a standardised axial  
53 patellofemoral joint view (Table 1).<sup>37</sup>  
54  
55  
56  
57  
58  
59  
60

*Magnetic resonance (MR) images* will be obtained from both knees at baseline for diagnostic purposes, to confirm an acute ACL tear in the index knee and to examine the status of the contralateral knee. At follow up, only the index knee will undergo MR image acquisition. MR images will be acquired using a Philips Ingenia 3T scanner with a 16-channel knee-coil and will be obtained at baseline, 3, 6, 12 and 24 months (Table 1).

Table 1. MR imaging, radiographic assessment and collection of biological samples over the study period for patients recruited at the Linköping site

|                        | Baseline | 3 months | 6 months | 12 months | 24 months | 60 months |
|------------------------|----------|----------|----------|-----------|-----------|-----------|
| WB radiographs         | X        | -        | -        | -         | -         | X         |
| Full clinical protocol | X*       | -        | -        | -         | -         | -         |
| Compositional protocol | X        | X        | X        | X         | -         | -         |
| Explorative protocol   | X        | X        | X        | X         | X         | X         |
| Blood                  | X        | X        | X        | X         | X         | X         |
| Urine                  | X        | X        | X        | X         | X         | X         |
| Joint fluid**          | X        |          |          |           |           |           |

\* *Bilateral assessment*

\*\* *Collection will be performed under anesthesia at the time of any surgery during follow up*

For *clinical evaluation and diagnostics*, the normal clinical protocol at the Linköping site will be followed (scan time 15 minutes, Table 2).

For *bone shape analyses*, a 3D PD sequence (scan time 6.5 minutes, Table 2) will be obtained.

For *compositional analysis* of cartilage and menisci, sagittal T2maps and T1Rho will be obtained (scan time approx. 16 minutes, Table 2).

For *exploratory purposes*, a new in-house developed sequence (Qmap) with the potential of reducing clinical and compositional scan time and adding explorative measures of T1-maps T2-maps and PD-maps will be obtained (scan time approximately 6 minutes, Table 2).<sup>38</sup>

Table 2. Detailed description of magnetic resonance imaging sequences

|                  |                                                                                                                                                                                                                  |
|------------------|------------------------------------------------------------------------------------------------------------------------------------------------------------------------------------------------------------------|
| Clinical package | Sagittal PD, 3 mm slice thickness with 0.3 mm gap. TE=20 ms; TR=1800 ms, ETL 10; FOV 160x145, ACQ matrix 516x384=0.31x0.38mm, recon matrix 528. Scan time 2:58 min.                                              |
|                  | Axial PD FatSat, 3 mm slice thickness with 0.3 mm gap. TE=35 ms; TR=3981 ms, ETL 15; FOV 140x140, ACQ matrix 332x330=0.42x0.42mm, recon matrix 512. Scan time 4:15min                                            |
|                  | Sagittal PD FatSat, 3 mm slice thickness with 0.3 mm gap. TE=30 ms; TR=3400 ms, ETL 15; FOV 160x145, ACQ matrix 468x399=0.31x0.40mm, recon matrix 528. Scan time 3:56min.                                        |
|                  | Coronal PD FatSat, 3 mm slice thickness with 0.3 mm gap. TE=30 ms; TR=3572 ms, ETL 16; FOV 160x140, ACQ matrix 516x332=0.31x0.42mm, recon matrix 528. Scan time 3:56min                                          |
| PD FS 3D         | Sagittal PD FatSat 3D, 0.63 mm slice thickness, TE=185, TR=1300, ETL=63, FOV=144x162, AQC matrix 228x226=0.63x0.63, recon matrix 448. Scan time 6:31min                                                          |
| T2map            | Sagittal T2-map (T2 relaxation), 3 mm slice thickness with 0.3 mm gap. TE=n*10 ms; TR=2371 ms, ETL 8; FOV 160x140, ACQ matrix 456x280=0.35x0.50mm, recon 560. Scan time 5:53min                                  |
| T1Rho            | 3D sagittal spin lock (T1Rho relaxation), 4 mm slice thickness. Spin lock time (1, 10, 20 and 40ms), (TE=3.3 ms; TR=6.4 ms, ETL 64; FOV 140x140, ACQ matrix 280x268=0.50x0.52mm, recon 352. Scan time 2:36min    |
| Qmap             | Sagittal Qmap (T1 relaxation, T2 relaxation, Proton Density), 3 mm slice thickness with 0.3 mm gap. TE=8.8/110 ms; TR=4217 ms, ETL 16; FOV 160x145, ACQ matrix 364x270=0.40x0.59mm, recon 576. Scan time 6:19min |

### Collection and storage of biological samples: sub-group of study participants

All samples will be stored in a dedicated biobank at -70°C.

*Joint fluid* (haemarthrosis) will be aspirated from the index knee at baseline to ascertain joint bleeding (highly indicative of severe knee injury), according to clinical routine. Due to the pain and discomfort associated with knee joint arthrocentesis (especially in knees without effusion), additional longitudinal collection of joint fluid will only be performed in case of

surgical procedure (collection will be during surgery). Collected samples will be centrifuged at 2500G for 10 minutes and aliquoted into 0.7ml tubes for storage.

*Venous blood* samples will be collected at the same visit as image acquisition. Collected samples will be centrifuged and aliquoted according to a specific protocol for storage.

*Urine samples* will be collected at first morning void (preferred). Collected samples will be centrifuged at 1800G for 10 minutes and aliquoted into 1.0mL tubes for storage at -70°C.

Analyses will include, but are not limited to, those presented in Table 3. In addition, several markers of inflammation, such as IL-6, IL-8, IL-10, IL-12, TNF- $\alpha$ , INF- $\gamma$ , will be analysed.

Table 3. Planned analyses of biomarkers

| BIOMARKER            | FLUID                   | PROCESS                      | TISSUE            |
|----------------------|-------------------------|------------------------------|-------------------|
| <b>ARGS-AGGRECAN</b> | Serum<br>Synovial fluid | Cartilage turnover           | Cartilage         |
| <b>CTX-II</b>        | Urine                   | Type II collagen degradation | Cartilage<br>Bone |
| <b>CTX-I</b>         | Serum<br>Urine          | Bone turnover                | Bone              |
| <b>COMP</b>          | Serum<br>Synovial fluid | Cartilage degradation        | Cartilage         |
| <b>C2C</b>           | Serum<br>Urine          | Type II collagen degradation | Cartilage         |
| <b>NTX-I</b>         | Serum<br>Urine          | Bone resorption              | Bone              |

### Decision making for choice of treatment and return to sport

Factors affecting the *decision of choice of treatment* (ACLR or not) will be evaluated by the patient, orthopedic surgeon and physiotherapist with questionnaires. Respondents will answer questions about why the particular treatment was chosen, if they perceive it was the right treatment choice, the agreement for choice of treatment between the clinicians and patient, about the patient's involvement and understanding of information, and about the communication between clinicians. The physiotherapist and patient also answer questions about patient rehabilitation.



1  
2  
3 Factors affecting the *decision for return to sports* (RTS) is evaluated at the time the patient  
4 replies that she/he is back to full sports participation of the goal sport/physical activity (with  
5 or without knee problems) based on the response to a question from the OSTRC  
6 questionnaire<sup>33</sup> (“have you had any difficulties participating in your sport activity due to  
7 your knee problems” with the response “full participation without or with knee problems”).  
8 Other questions capture the areas on how the decision for RTS was taken, possible criteria  
9 used to approve RTS, activity and participation modification.  
10  
11  
12  
13  
14  
15  
16  
17

### 18 Primary outcomes and statistical analyses

19 A suite of analyses is planned for each of the 5 main study objectives.  
20

21 **Study objective A: assessment of the biological, psychological and social factors, and**  
22 **their relationships to the natural corollaries and recovery after acute ACL injury**  
23  
24  
25

#### 26 *Specific aims:*

- 27  
28 1. Assess whether there is a relationship between knee status and self-reported  
29 function early (up to 8 weeks) following ACL injury, and the IKDC-SKF at 3 and 12  
30 months follow-up.  
31  
32
- 33 2. Assess whether there is a relationship between knee status in the first 8 weeks  
34 following injury and functional performance at 12 months follow-up  
35  
36
- 37 3. Evaluate how physical activity, self-reported activity participation or as measured by  
38 activPAL, in the first 8 weeks after ACL injury is related to self-reported function and  
39 functional performance at 3 and 12 months after injury.  
40  
41
- 42 4. Investigate the prognostic relationship between returning to physical activity after  
43 ACL injury, and key biological, psychological and social factors.  
44  
45

46 *Primary outcome:* Self-reported physical activity participation and IKDC subjective knee score  
47 at 12 months follow-up  
48  
49

50 *Secondary outcomes:* functional performance at 3, 6, 12 and 24 months follow-up, time to  
51 return to the goal physical activity  
52  
53

54 *Statistical analysis:* We will use generalised estimating equations (GEE) to assess longitudinal  
55 relationships between knee status and subjective knee function. The outcome variable will  
56  
57  
58  
59

1  
2  
3 be IKDC subjective knee form score. Predictor variables may include knee joint effusion,  
4 laxity and range of motion, and SANE.  
5

6  
7 We will use GEE to assess longitudinal relationships between knee status and functional  
8 performance. The outcome variables will be measures of hopping performance, strength  
9 and postural control. Predictor variables may include knee joint effusion, laxity and range of  
10 motion, and SANE.  
11  
12

13  
14 We will use multilevel modelling to assess relationships between physical activity and knee  
15 status. The outcome variable will be IKDC subjective knee form score. Predictor variables  
16 may include physical activity (self-reported and objectively measured), knee status (extent of  
17 index injury (i.e. concomitant injuries), knee joint effusion, laxity and range of motion), age  
18 and sex.  
19  
20  
21  
22

23  
24 We will use multilevel modelling to assess the prognostic relationship between returning to  
25 the goal physical activity and biopsychosocial factors. The outcome variable will be time to  
26 return to the goal physical activity. The predictor variables will be different biopsychosocial  
27 factors (collected with questionnaires and clinical examination). We will use factor analysis  
28 to guide which independent variables are entered into the model.  
29  
30  
31  
32  
33  
34

### 35 Study objective B: evaluation of the choice of treatment after ACL injury

#### 36 *Specific aims:*

- 37 1. Describe factors that are important for the choice of treatment after an ACL injury,  
38 i.e. ACLR or non-ACLR, from patients, orthopedic surgeons' and physical therapists'  
39 perspective  
40  
41  
42  
43
- 44 2. To confirm the factors identified as important for treatment choice, using  
45 demographic and patient-reported data  
46  
47
- 48 3. Assess the relationship between factors (biological, psychological, social factors and  
49 factors that affected the choice of treatment) and satisfactory knee function (IKDC  
50 subjective knee form) at 12 months  
51  
52
- 53 4. Describe the decision-making process for treatment and evaluate patient satisfaction  
54 with the decision that was made  
55  
56  
57  
58  
59  
60

1  
2  
3 *Primary outcomes:* satisfaction with the treatment choice and the relationship to patient-  
4 reported outcome (IKDC) at 12 months after injury or ACL-R  
5

6  
7 *Secondary outcomes:* factors affecting treatment decision  
8

9 *Statistical analysis:* we will summarise the treatment decision factors reported by patients  
10 and clinicians descriptively using frequency tables. We will confirm whether specific  
11 treatment factors exist for individual patients, by matching the patient's own demographic  
12 and/or patient-reported data to the relevant factor.  
13  
14  
15

16 We will use factor analysis to determine the common constructs underlying the factors that  
17 are important for the choice of treatment. The smaller number of related groups of factors  
18 will be used in a subsequent multivariable model. We will run separate analyses for the  
19 factors cited as important for the decision for ACLR and the factors cited as important for the  
20 decision for non-ACLR.  
21  
22  
23  
24

25 Finally, we will use a multilevel model to estimate the relationship between biopsychosocial  
26 factors and self-reported knee function at 12 months. The outcome variable will be IKDC  
27 subjective knee form score at 12 months. The predictor variables may include clusters of  
28 biopsychosocial factors (identified in A - Assessment of the biological, psychological and  
29 social factors, and their relationships to the natural corollaries and recovery after acute ACL  
30 injury) and treatment choice clusters (independent variables). The model will be adjusted for  
31 treatment received (i.e. ACLR or non-ACLR).  
32  
33  
34  
35  
36  
37  
38  
39

#### 40 **Study objective C: evaluation of return to sport after ACL injury**

##### 41 *Specific aims:*

- 42 1. Describe the decision-making process for return to sport following ACL injury
  - 43 2. Describe the criteria physiotherapists use in clinical practice to clear patients to  
44 return to sport after ACL injury
  - 45 3. Validate the criteria used to clear patients to return to sport after ACL injury
- 46  
47  
48  
49  
50

51 *Primary outcome:* return to sport rate at 24 months follow-up  
52

53 *Secondary outcomes:* time to return to sport, sports participation rates over time, incidence  
54 of new knee injuries  
55  
56  
57

1  
2  
3 Statistical analysis: we will summarise the return to sport decision factors reported by  
4 patients and clinicians descriptively using frequency tables. We will also summarise the  
5 criteria used by clinicians to decide when the patient was ready to return to sport  
6 descriptively using frequency tables. To assess the discriminant validity of the criteria used  
7 to clear patients to return to sport after ACL injury, we will use logistic regression analyses to  
8 compare relevant outcomes (e.g. strength, effusion, range of motion) between participants  
9 who do and do not return to sport.  
10  
11  
12  
13  
14  
15  
16  
17

#### 18 Study objective D: knee problems in the short- and long-term after acute ACL injury

##### 19 *Specific aim:*

- 21 1. Describe the rate and nature of knee problems (new acute knee injury, gradual onset  
22 knee injury and osteoarthritis) after index ACL injury
- 23 2. Assess whether there is a relationship between biological, psychological and social  
24 factors, and new knee problems after acute ACL injury  
25  
26  
27  
28

29 Primary outcome: new acute knee injury

30  
31 Secondary outcomes: gradual onset knee injury, osteoarthritis

32  
33  
34 Statistical analysis: we will use a time-to-event analysis to estimate the rate of new acute  
35 knee injuries (may include new ACL tears, new meniscus tears), the rate of radiographic  
36 osteoarthritis and the rate of symptomatic osteoarthritis. The predictor variables may  
37 include concomitant injury to other knee structures at index ACL injury, treatment (ACLR or  
38 non-ACLR), sex, age and clusters of biopsychosocial factors (identified in A - Assessment of  
39 the biological, psychological and social factors, and their relationships to the natural  
40 corollaries and recovery after acute ACL injury).

41  
42 We will use a multi-level modeling approach to assess whether there is a relationship  
43 between biopsychosocial factors and gradual onset knee injuries. The independent variables  
44 may include clusters of biopsychosocial factors (identified in “Assessment of the biological,  
45 psychological and social factors, and their relationships to the natural corollaries and  
46 recovery after acute ACL injury”), treatment, sex and age.  
47  
48  
49  
50  
51  
52  
53  
54  
55  
56  
57  
58  
59  
60

## Study objective E: identification of proxies for early detection of osteoarthritis

### *Specific aims*

1. Identify imaging-based proxies of early radiographic and symptomatic osteoarthritis
2. Identify change in specific local and/or systemic molecular biomarkers (biological proxies) and investigate their relation to imaging based structural change and patient relevant outcomes
3. Investigate the temporal relation between symptoms, structure and biology after knee injury

*Primary outcome:* radiographic osteoarthritis at 5-years follow-up

*Secondary outcomes:* MR-defined at 2-years follow-up; symptoms as defined by IKDC subjective knee form and SANE at 2- and 5-years follow-up

*Statistical analysis:* We will use a multi-level modelling approach to relate predictor variables that may include imaging-based and biologically-based proxies, and possible risk factors (e.g. concomitant injury to other knee structures at index ACL injury, treatment (ACLR or non-ACLR), new meniscus injury, activity participation) to the primary and secondary outcomes. We will adjust for potential confounders that may include sex, age, and body mass index.

### Sample size calculation

For regression analysis in the different parts, using approximately 10 independent variables for each outcome, at least 130 participants will be included.<sup>39</sup> For part B and C, evaluating decision for treatment and RTS, we need geographically spread collected data in order to be generalisable. Since there might be different routines and common praxis among different clinics even in the same geographical area, it is important to include different clinics when collecting data. We are collecting data from seven different counties, and several clinics within these counties, spreading from south to north of Sweden. We expect to collect data regarding decision making from at least about 25 orthopedic surgeons (about 10% of all surgeons performing ACL reconstructions over Sweden) and at least 45 physiotherapists (there is no registry for the number of physiotherapists treating ACL injured patients in Sweden).

## Patient and Public Involvement

Participants will receive a short summary of the results following completion of the study.

## Timeline

Patient recruitment started in October 2016 and will continue until June 2018.

## Ethics and dissemination

Being included in this study will not influence which treatment the patient will receive. The study is approved by the regional Ethical committee in Linköping, Sweden (Dnr 2016/44-31 and 2017/221-32).

Results will be presented at national and international conferences and submitted for publication to peer-reviewed journals. Participants will receive short summary of the study.

## Figure legends

Figure 1. Flow chart of the NACOX study follow-up plan. w1, w2 and m3, m6 etc: denote weeks or months after injury. Each box denotes when a questionnaire will be sent; shaded boxes indicate extended questionnaires. Time points for clinical examination (blue arrows), Magnetic Resonance Imaging (MRI) and lab and x-rays (black arrows) are indicated. Baseline questionnaire, clinical examination, MRI, lab and x-ray are within 6 weeks after the injury.

Figure 2. Reported outcomes at different time points after injury or reconstruction. KOOS<sub>4</sub>, Knee Injury and Osteoarthritis Outcome Score, subscales for pain, symptoms, function in sport and recreation and knee-related quality of life; RTS, return to sport; \*, answered by the patient, orthopedic surgeon and physiotherapist; (x), only some questions are asked during these timepoints; <sup>1</sup>, question answered when the decision for ACLR is made; <sup>2</sup>, question answered by the patient and physiotherapist when the patient has returned to full sports participation; <sup>3</sup>, assessed only for non-ACLR; <sup>4</sup>, only the subscales "life style" and "social and emotional" of the ACL-QoL; QoL, quality of life.

## References

1. Frobell RB, Lohmander LS, Roos HP. Acute rotational trauma to the knee: poor agreement between clinical assessment and magnetic resonance imaging findings. *Scand J Med Sci Sports* 2007;17(2):109-14.
2. Grindem H, Eitzen I, Engebretsen L, et al. Nonsurgical or Surgical Treatment of ACL Injuries: Knee Function, Sports Participation, and Knee Reinjury: The Delaware-Oslo ACL Cohort Study. *J Bone Joint Surg Am* 2014;96(15):1233-41.
3. Lohmander LS, Englund PM, Dahl LL, et al. The long-term consequence of anterior cruciate ligament and meniscus injuries: osteoarthritis. *Am J Sports Med* 2007;35(10):1756-69.
4. Ajuied A, Wong F, Smith C, et al. Anterior cruciate ligament injury and radiologic progression of knee osteoarthritis: a systematic review and meta-analysis. *Am J Sports Med* 2014;42(9):2242-52.
5. Sanders TL, Kremers HM, Bryan AJ, et al. Is anterior cruciate ligament reconstruction effective in preventing secondary meniscal tears and osteoarthritis? *Am J Sports Med* 2016;44(7):1699-707.
6. Frobell RB, Roos HP, Roos EM, et al. Treatment for acute anterior cruciate ligament tear: five year outcome of randomised trial. *BMJ* 2013;346:f232.
7. Grindem H, Eitzen I, Moksnes H, et al. A pair-matched comparison of return to pivoting sports at 1 year in anterior cruciate ligament-injured patients after a nonoperative versus an operative treatment course. *Am J Sports Med* 2012;40(11):2509-16.
8. Österberg A, Kvist J, Dahlgren MA. Ways of experiencing participation and factors affecting the activity level after nonreconstructed anterior cruciate ligament injury: a qualitative study. *J Orthop Sports Phys Ther* 2013;43(3):172-83.
9. Ardern C, Kvist J, Webster K. Psychological aspects of anterior cruciate ligament injuries. *Operative Techniques in Sports Medicine* 2016;24(1):77-83.
10. Chalmers PN, Mall NA, Moric M, et al. Does ACL reconstruction alter natural history?: A systematic literature review of long-term outcomes. *J Bone Joint Surg Am* 2014;96(4):292-300.
11. Nordenvall R, Bahmanyar S, Adami J, et al. Cruciate ligament reconstruction and risk of knee osteoarthritis: the association between cruciate ligament injury and post-traumatic osteoarthritis. a population based nationwide study in Sweden, 1987-2009. *PLoS one* 2014;9(8):e104681.
12. Øiestad BE, Engebretsen L, Storheim K, et al. Knee osteoarthritis after anterior cruciate ligament injury: a systematic review. *Am J Sports Med* 2009;37(7):1434-43.
13. Larsson S, Struglics A, Lohmander LS, et al. Surgical reconstruction of ruptured anterior cruciate ligament prolongs trauma-induced increase of inflammatory cytokines in synovial fluid: an exploratory analysis in the KANON trial. *Osteoarthritis Cartilage* 2017;25(9):1443-51.
14. Davis JC, Bryan S. Patient Reported Outcome Measures (PROMs) have arrived in sports and exercise medicine: Why do they matter? *Br J Sports Med* 2015;49(24):1545-6.
15. Graham B, Green A, James M, et al. Measuring patient satisfaction in orthopaedic surgery. *The J Bone Joint Surg Am* 2015;97(1):80-4.
16. Ardern CL, Österberg A, Sonesson S, et al. Satisfaction with knee function after primary anterior cruciate ligament reconstruction is associated with self-efficacy, quality of life, and returning to the preinjury physical activity. *Arthroscopy* 2016;32(8):1631-38.
17. Engstrand C, Kvist J, Krevers B. Patients' perspective on surgical intervention for Dupuytren's disease - experiences, expectations and appraisal of results. *Disabil Rehabil* 2016;38(26):2538-49.
18. Sonesson S, Kvist J, Ardern C, et al. Psychological factors are important to return to pre-injury sport activity after anterior cruciate ligament reconstruction: expect and motivate to satisfy. *Knee Surg Sports Traumatol Arthrosc* 2016;25(5):1375-84.

19. Lynch AD, Logerstedt DS, Grindem H, et al. Consensus criteria for defining 'successful outcome' after ACL injury and reconstruction: a Delaware-Oslo ACL cohort investigation. *Br J Sports Med* 2015;49(5):335-42.
20. Filbay SR, Roos EM, Frobell RB, et al. Delaying ACL reconstruction and treating with exercise therapy alone may alter prognostic factors for 5-year outcome: an exploratory analysis of the KANON trial. *Br J Sports Med* 2017;51(22):1622-29.
21. Ahlden M, Kvist J, Samuelsson K, et al. [Individualized therapy is important in anterior cruciate ligament injuries]. *Lakartidningen* 2014;111(36):1440-3.
22. Tigerstrand Grevnerts H, Grävare Silbernagel K, Sonesson S, et al. Translation and testing of measurement properties of the Swedish version of the IKDC subjective knee form. *Scand J Med Sci Sports* 2017;27(5):554-62.
23. Shelbourne KD, Barnes AF, Gray T. Correlation of a single assessment numeric evaluation (SANE) rating with modified Cincinnati Knee Rating System and IKDC subjective total scores for patients after ACL reconstruction or knee arthroscopy. *Am J Sports Med* 2012;40(11):2487-91.
24. Roos EM, Roos HP, Ekdahl C, et al. Knee injury and Osteoarthritis Outcome Score (KOOS)-- validation of a Swedish version. *Scand J Med Sci Sports* 1998;8(6):439-48.
25. Grindem H, Eitzen I, Snyder-Mackler L, et al. Online registration of monthly sports participation after anterior cruciate ligament injury: a reliability and validity study. *Br J Sports Med* 2014;48(9):748-53.
26. Love J, Moore CD, Hensing G. Validation of the Swedish translation of the General Self-Efficacy scale. *Qual Life Res* 2012;21(7):1249-53.
27. Thomeé P, Währborg P, Börjesson M, et al. A new instrument for measuring self-efficacy in patients with an anterior cruciate ligament injury. *Scand J Med Sci Sports* 2006;16(3):181-7.
28. Kvist J, Österberg A, Gauffin H, et al. Translation and measurement properties of the Swedish version of ACL-Return to Sports after Injury questionnaire. *Scand J Med Sci Sports* 2013;23(5):568-75.
29. Cherkin DC, Deyo RA, Street JH, et al. Predicting poor outcomes for back pain seen in primary care using patients' own criteria. *Spine (Phila Pa 1976)* 1996;21(24):2900-7.
30. Mohtadi N. Development and validation of the quality of life outcome measure (questionnaire) for chronic anterior cruciate ligament deficiency. *Am J Sports Med* 1998;26(3):350-9.
31. Kolt GS, Brewer BW, Pizzari T, et al. The Sport Injury Rehabilitation Adherence Scale: a reliable scale for use in clinical physiotherapy. *Physiotherapy* 2007;93(1):17-22.
32. Fältström A, Hagglund M, Kvist J. Factors associated with playing football after anterior cruciate ligament reconstruction in female football players. *Scand J Med Sci Sports* 2016;26(11):1343-52.
33. Clarsen B, Myklebust G, Bahr R. Development and validation of a new method for the registration of overuse injuries in sports injury epidemiology: the Oslo Sports Trauma Research Centre (OSTRC) overuse injury questionnaire. *Br J Sports Med* 2013;47(8):495-502.
34. Sturgill LP, Snyder-Mackler L, Manal TJ, et al. Interrater reliability of a clinical scale to assess knee joint effusion. *J Orthop Sports Phys Ther* 2009;39(12):845-9.
35. Reid A, Birmingham TB, Stratford PW, et al. Hop testing provides a reliable and valid outcome measure during rehabilitation after anterior cruciate ligament reconstruction. *Phys Ther* 2007;87(3):337-49.
36. Brandt KD, Mazzuca SA, Conrozier T, et al. Which is the best radiographic protocol for a clinical trial of a structure modifying drug in patients with knee osteoarthritis? *J Rheumatol* 2002;29(6):1308-20.
37. Boegard TL, Rudling O, Petersson IF, et al. Joint space width of the tibiofemoral and of the patellofemoral joint in chronic knee pain with or without radiographic osteoarthritis: a 2-year follow-up. *Osteoarthritis Cartilage* 2003;11(5):370-6.
38. Warntjes JB, Leinhard OD, West J, et al. Rapid magnetic resonance quantification on the brain: optimization for clinical usage. *Magn Reson Med* 2008;60(2):320-9.



1  
2  
3 39. Tabatchnick BG, Fidell LS. Using multivariate statistics. 4th ed. Needham Heights, MA: Allyn &  
4 Bacon 2001.  
5  
6  
7  
8  
9  
10

### 11 Authors' contributions:

12 JK wrote the first draft and coordinated the preparation of the protocol together with CA. HG, HTG,  
13 MH, AS and RF were responsible for different parts of the protocol writing. All authors revised and  
14 accepted the final manuscript of the protocol.  
15  
16  
17  
18

### 19 Funding statement

20 This work is supported by the Swedish Medical Research Council (VR 2015-03687), the Swedish  
21 Research Council for Sport Science (CIF P2016-0063 and P2017-0151), the Medical Research Council  
22 of Southeast Sweden FORSS (FORSS -662081) and the Medical Faculty at Linköping University,  
23 Sweden.  
24  
25  
26  
27  
28  
29  
30  
31  
32  
33  
34  
35  
36  
37  
38  
39  
40  
41  
42  
43  
44  
45  
46  
47  
48  
49  
50  
51  
52  
53  
54  
55  
56  
57  
58  
59  
60

## Acknowledgement

The NACOX Cohort study group involves the authors named on this paper and the following collaborators:

- Michael A Bowes, Sr Director Clinical Applications, Imorphics Ltd, Manchester, UK
- Victor Casula, PhD, Research Unit of Medical Imaging, Physics and Technology, University of Oulu, Finland
- Anna Fahlgren, Associate Professor, Experimentell Ortopedi, Department of Clinical and Experimental Medicine, Linköping University, Sweden
- Anne Fältström, Physiotherapist, PhD, Region Jönköping County, Rehabilitation Centre, Ryhov County Hospital, Jönköping
- Johan Kihlberg, Radiographer, Center for Medical Image Science and Visualization (CMIV), Department of Medical and Health Sciences, Linköping University, Sweden
- Barbro Krevers, Associate Professor, Division of Health Care Analysis, Department of Medical and Health Sciences, Linköping University, Sweden
- Maria Lindblom, MD Center for Medical Image Science and Visualization (CMIV), Department of Radiology, Linköping University, Sweden
- Per Magnusson, Adjunct Professor, Clinical Chemistry, Department of Clinical and Experimental Medicine, Linköping University, Sweden
- Miika Nieminen, Professor, Research Unit of Medical Imaging, Physics and Technology, University of Oulu, Finland; Department of Diagnostic Radiology, Oulu University Hospital, Finland
- Anders Persson, Professor, Center for Medical Image Science and Visualization (CMIV), Department of Medical and Health Sciences, Linköping University, Sweden

## Competing interests statement

None declared

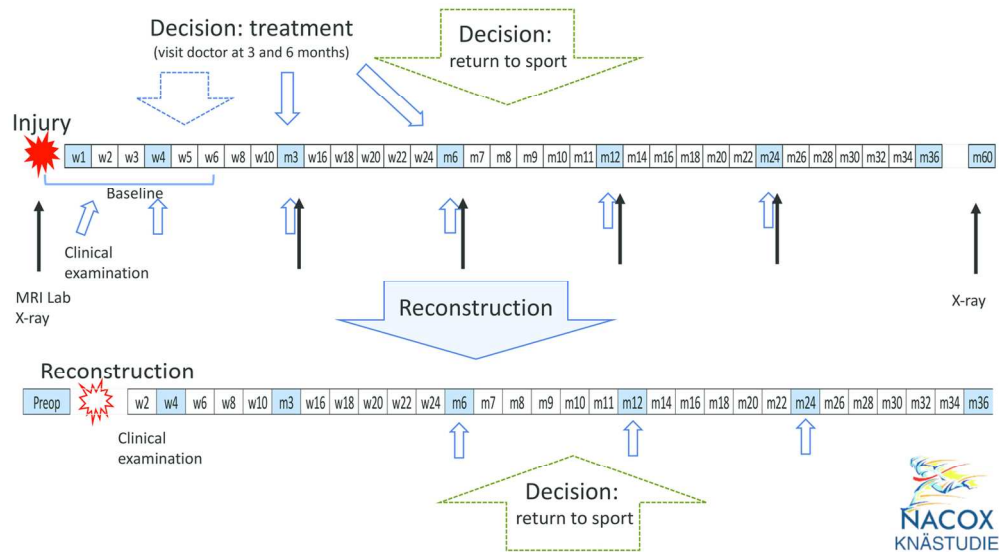

Figure 1. Flow chart of the NACOX study follow-up plan. w1, w2 and m3, m6 etc: denote weeks or months after injury. Each box denotes when a questionnaire will be sent; shaded boxes indicate extended questionnaires. Time points for clinical examination (blue arrows), Magnetic Resonance Imaging (MRI) and lab and x-rays (black arrows) are indicated. Baseline questionnaire, clinical examination, MRI, lab and x-ray are within 6 weeks after the injury.

139x77mm (300 x 300 DPI)

|                                   |          | once a month |    |    |    |     |    |     |     |     |     |     |     | every other month |     |        |       | every other month |        |     |        |     |       |
|-----------------------------------|----------|--------------|----|----|----|-----|----|-----|-----|-----|-----|-----|-----|-------------------|-----|--------|-------|-------------------|--------|-----|--------|-----|-------|
| Injury                            | Baseline | w1           | w2 | w3 | w4 | w5  | w6 | w8  | w10 | m3  | w16 | w18 | w20 | w22               | w24 | m6     | m7-11 | m12               | m14-22 | m24 | m26-36 | m36 | Extra |
| Reconstruction                    | Preop    | w2           | w4 | w5 | w8 | w10 | m3 | w16 | w18 | w20 | w22 | w24 | m6  | m7-11             | m12 | m14-22 | m24   | m26-36            | m36    |     |        |     |       |
| Demographics and baseline         | x        |              |    |    |    |     |    |     |     | (x) |     |     |     |                   |     | (x)    |       |                   |        | (x) |        |     | (x)   |
| Knee function and participation   | x        |              |    |    |    |     |    |     |     |     |     |     |     |                   |     |        |       |                   |        |     |        |     |       |
| IKDC-SKF                          | x        |              |    |    | x  |     |    |     |     |     |     |     |     |                   |     |        |       |                   |        |     |        |     |       |
| SANE                              | x        | x            | x  | x  | x  | x   | x  | x   | x   | x   | x   | x   | x   | x                 | x   | x      | x     | x                 | x      | x   | x      | x   | x     |
| Subjective knee stability         | x        | x            |    |    | x  |     |    |     |     |     |     |     |     |                   |     |        |       |                   |        |     |        |     |       |
| Giving way                        | x        |              |    |    |    |     |    |     |     |     |     |     |     |                   |     |        |       |                   |        |     |        |     |       |
| KOOS                              |          |              |    |    |    |     |    |     |     |     |     |     |     |                   |     |        |       |                   |        |     |        |     |       |
| Physical activity participation   | x        | x            | x  | x  | x  | x   | x  | x   | x   | x   | x   | x   | x   | x                 | x   | x      | x     | x                 | x      | x   | x      | x   | x     |
| Expectations and fulfillment      | x        | x            |    |    | x  |     |    |     |     |     |     |     |     |                   |     |        |       |                   |        |     |        |     |       |
| Motivation to RTS                 | x        | x            |    |    |    |     |    |     |     |     |     |     |     |                   |     |        |       |                   |        |     |        |     |       |
| RTS (goal and actual RTS)         | x        | x            |    |    | x  |     |    |     |     |     |     |     |     |                   |     |        |       |                   |        |     |        |     |       |
| Reasons for not RTS               |          |              |    |    |    |     |    |     |     |     |     |     |     |                   |     |        |       |                   |        |     |        |     |       |
| Factors affecting RTS             |          |              |    |    |    |     |    |     |     |     |     |     |     |                   |     |        |       |                   |        |     |        |     |       |
| Psychological factors             |          |              |    |    |    |     |    |     |     |     |     |     |     |                   |     |        |       |                   |        |     |        |     |       |
| General self efficacy             | x        |              |    |    |    |     |    |     |     |     |     |     |     |                   |     |        |       |                   |        |     |        |     |       |
| Knee self efficacy                | x        | x            |    |    |    |     |    |     |     |     |     |     |     |                   |     |        |       |                   |        |     |        |     |       |
| ACL-RSI                           |          |              |    |    |    |     |    |     |     |     |     |     |     |                   |     |        |       |                   |        |     |        |     |       |
| Satisfaction                      |          |              |    |    |    |     |    |     |     |     |     |     |     |                   |     |        |       |                   |        |     |        |     |       |
| Quality of Life                   |          |              |    |    |    |     |    |     |     |     |     |     |     |                   |     |        |       |                   |        |     |        |     |       |
| ACL-QoL                           |          |              |    |    |    |     |    |     |     |     |     |     |     |                   |     |        |       |                   |        |     |        |     |       |
| KOOS QoL                          |          |              |    |    |    |     |    |     |     |     |     |     |     |                   |     |        |       |                   |        |     |        |     |       |
| Rehabilitation and health care    |          |              |    |    |    |     |    |     |     |     |     |     |     |                   |     |        |       |                   |        |     |        |     |       |
| Frequency                         |          |              | x  | x  | x  | x   | x  | x   | x   | x   | x   | x   | x   | x                 | x   | x      | x     | x                 | x      | x   | x      | x   | x     |
| Adherence                         |          |              |    |    |    |     |    |     |     |     |     |     |     |                   |     |        |       |                   |        |     |        |     |       |
| Importance                        |          |              |    |    |    |     |    |     |     |     |     |     |     |                   |     |        |       |                   |        |     |        |     |       |
| Experience with health care       |          |              |    |    |    |     |    |     |     |     |     |     |     |                   |     |        |       |                   |        |     |        |     |       |
| Decision of treatment*            |          |              |    |    |    |     |    |     |     |     |     |     |     |                   |     |        |       |                   |        |     |        |     |       |
| New injuries                      |          | x            | x  | x  | x  | x   | x  | x   | x   | x   | x   | x   | x   | x                 | x   | x      | x     | x                 | x      | x   | x      | x   | x     |
| Problems during physical activity |          |              |    |    |    |     |    |     |     |     |     |     |     |                   |     |        |       |                   |        |     |        |     |       |

Figure 2. Reported outcomes at different time points after injury or reconstruction. KOOS4, Knee Injury and Osteoarthritis Outcome Score, subscales for pain, symptoms, function in sport and recreation and knee-related quality of life; RTS, return to sport; \*, answered by the patient, orthopedic surgeon and physiotherapist; (x), only some questions are asked during these timepoints; 1, question answered when the decision for ACLR is made; 2, question answered by the patient and physiotherapist when the patient has returned to full sports participation; 3, assessed only for non-ACLR; 4, only the subscales "life style" and "social and emotional" of the ACL-QoL; QoL, quality of life.

126x59mm (300 x 300 DPI)

# BMJ Open

## Natural corollaries and recovery after acute ACL injury – the NACOX cohort study protocol

|                                 |                                                                                                                                                                                                                                                                                                                                                                                                                                                                                                                                                                                                                                                                                                                      |
|---------------------------------|----------------------------------------------------------------------------------------------------------------------------------------------------------------------------------------------------------------------------------------------------------------------------------------------------------------------------------------------------------------------------------------------------------------------------------------------------------------------------------------------------------------------------------------------------------------------------------------------------------------------------------------------------------------------------------------------------------------------|
| Journal:                        | <i>BMJ Open</i>                                                                                                                                                                                                                                                                                                                                                                                                                                                                                                                                                                                                                                                                                                      |
| Manuscript ID                   | bmjopen-2017-020543.R2                                                                                                                                                                                                                                                                                                                                                                                                                                                                                                                                                                                                                                                                                               |
| Article Type:                   | Protocol                                                                                                                                                                                                                                                                                                                                                                                                                                                                                                                                                                                                                                                                                                             |
| Date Submitted by the Author:   | 24-Apr-2018                                                                                                                                                                                                                                                                                                                                                                                                                                                                                                                                                                                                                                                                                                          |
| Complete List of Authors:       | Kvist, Joanna; Medical and Health Sciences, Physiotherapy; Neurobiology, Care Sciences and Socie, Division of Physiotherapy<br>Gauffin, Håkan; Department of Clinical and Experimental Medicine<br>Tigerstrand Grevnerts, Hanna; Department of Medical and Health Sciences, Division of Physiotherapy; Department of Medical and Health Sciences, Department of Activity and Health<br>Ardern, CL; Linköping University, Division of Physiotherapy<br>Hagglund, Martin; Department of Medical and Health Sciences, Division of Physiotherapy<br>Stålmán, Anders; Capiro ArtroClinic, Stockholm Sports Trauma Research Center, Sophiahemmet<br>Frobell, Richard; Lund University, Orthopedics, Clinical Sciences Lund |
| <b>Primary Subject Heading</b>: | Sports and exercise medicine                                                                                                                                                                                                                                                                                                                                                                                                                                                                                                                                                                                                                                                                                         |
| Secondary Subject Heading:      | Rehabilitation medicine                                                                                                                                                                                                                                                                                                                                                                                                                                                                                                                                                                                                                                                                                              |
| Keywords:                       | Knee < ORTHOPAEDIC & TRAUMA SURGERY, Musculoskeletal disorders < ORTHOPAEDIC & TRAUMA SURGERY, Magnetic resonance imaging < RADIOLOGY & IMAGING, SPORTS MEDICINE, Orthopaedic & trauma surgery < SURGERY                                                                                                                                                                                                                                                                                                                                                                                                                                                                                                             |
|                                 |                                                                                                                                                                                                                                                                                                                                                                                                                                                                                                                                                                                                                                                                                                                      |

SCHOLARONE™  
Manuscripts

## Study protocol

Natural corollaries and recovery after acute ACL injury – the NACOX cohort study protocol

J Kvist, H Gauffin, H Tigerstrand Grevnerts, C Ardern, M Hägglund, A Stålmán, R Frobell

### Contact information:

#### Principal investigator:

Joanna Kvist, physiotherapist,  
Professor, Division of Physiotherapy, Department of Medical and Health Sciences, Linköping University, Sweden;  
Center for Medical Image Science and Visualization (CMIV), Department of Medical and Health Sciences, Linköping University, Sweden;  
Division of Physiotherapy, Department of Neurobiology, Care Sciences and Society, Karolinska Institutet, Stockholm, Sweden;  
joanna.kvist@liu.se, Tel +46 732 713077

#### Co-investigators:

- Håkan Gauffin, MD, PhD, Department of Orthopaedics, Linköping University, Linköping, Sweden
- Hanna Tigerstrand Grevnerts, physiotherapist, PhD student, Division of Physiotherapy and Department of Activity and Health, Department of Medical and Health Sciences, Linköping University, Sweden
- Richard Frobell, PhD, Associate Professor, Orthopedics, Clinical Sciences Lund, Lund University, Sweden
- Clare Ardern, physiotherapist, post-doctoral researcher, Division of Physiotherapy, Department of Medical and Health Sciences, Linköping University, Sweden; School of Allied Health, La Trobe University, Melbourne, Australia
- Martin Hägglund, physiotherapist, Associate Professor, Division of Physiotherapy, Department of Medical and Health Sciences, Linköping University, Sweden
- Anders Stålmán, MD PhD, Capio ArtroClinic, Stockholm Sports Trauma Research Center, Sophiahemmet, Stockholm

#### Collaborators:

- Michael A Bowes, Sr Director Clinical Applications, Imorphics Ltd, Manchester, UK
- Victor Casula, PhD, Research Unit of Medical Imaging, Physics and Technology, University of Oulu, Finland
- Anna Fahlgren, Associate Professor, Experimentell Ortopedi, Department of Clinical and Experimental Medicine, Linköping University, Sweden
- Anne Fältström, Physiotherapist, PhD, Region Jönköping County, Rehabilitation Centre, Ryhov County Hospital, Jönköping

- Johan Kihlberg, Radiograph, Center for Medical Image Science and Visualization (CMIV), Department of Medical and Health Sciences, Linköping University, Sweden
- Barbro Krevers, Associate Professor, Division of Health Care Analysis, Department of Medical and Health Sciences, Linköping University, Sweden
- Maria Lindblom, MD Center for Medical Image Science and Visualization (CMIV), Department of Radiology, Linköping University, Sweden
- Per Magnusson, Adjunct Professor, Clinical Chemistry, Department of Clinical and Experimental Medicine, Linköping University, Sweden
- Miika Nieminen, Professor, Research Unit of Medical Imaging, Physics and Technology, University of Oulu, Finland; Department of Diagnostic Radiology, Oulu University Hospital, Finland
- Anders Persson, Professor, Center for Medical Image Science and Visualization (CMIV), Department of Medical and Health Sciences, Linköping University, Sweden

## ABSTRACT

### Introduction

Anterior cruciate ligament (ACL) injury can result in joint instability, decreased functional performance, reduced physical activity and quality of life, and an increased risk for post-traumatic osteoarthritis. Despite the development of new treatment techniques and extensive research, the complex and multifaceted nature of ACL injury and its consequences are yet to be fully understood. The overall aim of the NACOX study is to evaluate the natural corollaries and recovery after an ACL injury.

### Methods and analysis

The NACOX study is a multi-centre prospective prognostic cohort study of patients with acute ACL injury. At 7 sites in Sweden, we will include patients aged 15-40 years, within 6 weeks after primary ACL injury. Patients will complete questionnaires at multiple occasions over the 3 years following injury or the 3 years following ACL reconstruction (for participants who have surgical treatment). In addition, a subgroup of 130 patients will be followed with clinical examinations, several imaging modalities, and biological samples. Data analyses will be specific to each aim.

### Ethics and dissemination

This study has been approved by the regional Ethical committee in Linköping, Sweden (Dnr 2016/44-31 and 2017/221-32). We plan to present the results at national and international conferences, and in peer-reviewed scientific journals. Participants will receive a short summary of the results following completion of the study.

*Trial registration:* NCT02931084

### Strengths and limitations of this study

- The prospective observational design with frequently-monitored biological, psychological and social variables allows analysis of outcomes at key, clinically-relevant time points after injury.
- Quantitative methods are used to assess the perspectives of important stakeholders in acute ACL injury management (patients and clinicians (orthopaedic surgeons and physiotherapists)).
- The utilisation of advanced imaging techniques and collection of biological samples for identification of proxies of early osteoarthritis that can be related to prospectively collected patient-reported outcome measures and clinical data.
- Loss to follow-up and missing data may be a risk due to the extensive collection of patient-reported outcomes. However, we have a dedicated study monitoring team, and a rigorous data analysis plan to appropriately deal with missing data.



## INTRODUCTION

Anterior cruciate ligament (ACL) injuries are common in young athletes. In Sweden, there are approximately 7000 new injuries per year representing approximately 0.81/1000 inhabitants aged 10-64 years.<sup>1</sup> Despite the extensive research to identify the best treatment algorithms, there are still many patients who report unsatisfactory outcomes regarding knee stability, activity level and quality of life following ACL injury.<sup>2,3</sup> This may be because research has tended to focus on single factors, rather than accounting for the multifactorial nature of injury and recovery. There is also a clinical dogma that ACL reconstruction is necessary for a successful outcome after ACL injury and to resume sporting activities.<sup>4,5</sup> Although there is evidence that some patients have functional disability fulfilling the clinical indications for ACL reconstruction,<sup>6</sup> with high quality rehabilitation, many patients achieve satisfactory knee function and participation in sports without surgery.<sup>7,8</sup>

An ACL injury has biological, psychological and social corollaries,<sup>9</sup> that directly affect the patient (e.g. impaired quality of life and lower physical activity participation), and may affect the community (e.g. increased health utilisation costs, impaired productivity, potential for increased chronic disease burden through flow-on development of non-communicable diseases associated with physical inactivity such as cardiovascular disease and diabetes). Taking a biopsychosocial approach, factors including the extent of the initial injury (e.g. whether there were other knee structures involved), factors directly related to the treatment (e.g. which intervention and when), and patient preferences, expectations and past experiences may all be relevant when assessing outcomes.

The most serious long-term corollary after ACL injury is the increased risk for post-traumatic osteoarthritis, estimated to be up to 50% by 15 years after injury.<sup>3</sup> This risk of developing osteoarthritis is higher if the ACL injury is associated with a meniscus tear, and there are conflicting results regarding whether having ACL reconstruction reduces or increases the risk of osteoarthritis.<sup>4,5,10-12</sup> The underlying mechanisms behind the development of osteoarthritis are not well understood. Altered biological processes due to injury and joint bleeding, concomitant structural injuries to the cartilage and the subchondral bone, and joint instability and subsequent altered biomechanics, may be relevant for the development of osteoarthritis. Secondary joint trauma (e.g. with additional meniscal tears, or ACL reconstruction<sup>13</sup>) may also influence the risk for osteoarthritis.

1  
2  
3 Outcomes need to be evaluated from both the patient's and the clinician's perspective.  
4 Patient-reported outcomes provide important insights into aspects of injury and recovery  
5 that cannot otherwise be observed or measured with clinical tests or imaging.<sup>14</sup> Clinical  
6 outcomes provide the clinician (and by extension – in a well applied shared decision-making  
7 approach – the patient) with feedback regarding the effects of different clinical decisions on  
8 injury (i.e. which treatment and when), and any physical changes that occur following a  
9 clinical decision (e.g. change in effusion and muscle strength, incidence of new injuries,  
10 development of osteoarthritis).  
11

12  
13  
14  
15  
16  
17 The short-term aim of ACL injury management is to achieve satisfactory knee function and  
18 physical activity participation. In the long-term, treatment should aim to reduce the risk of  
19 developing osteoarthritis. Satisfaction is complex and short-term success (e.g. returning to  
20 pivoting sports) may facilitate longer term failure (e.g. developing osteoarthritis after  
21 sustaining a second or third meniscal injury). From the patient's perspective, satisfaction can  
22 relate to both the outcome of management of the injury (including knee function,  
23 confidence to participate in physical activity, fulfillment of expectations for recovery), and to  
24 the process of health care delivery (including being an active participant in the decision  
25 making process, communication with clinicians, information about the injury and  
26 treatment).<sup>15-18</sup> The clinician needs to monitor the resolution of impairments (knee stability,  
27 symmetrical lower limb muscle strength, absence of knee effusion), to ensure that  
28 treatment is tailored so that the patient has the physical capacity to reach his or her  
29 expectations (e.g. return to sport, return to occupation).<sup>19</sup> However, it is evident that these  
30 criteria cover only some of the spectrum of possible corollaries of ACL injury.  
31

32  
33  
34  
35  
36  
37  
38  
39  
40  
41  
42 There is evidence that treatment after ACL injury needs to be individualised.<sup>20</sup> The clinician  
43 needs to be able to account for and (ideally) address the important biological, psychological  
44 and social factors for each patient. However, we still lack evidence regarding which factors,  
45 for which patient, at which time; and this poses challenges for clinical practice. Therefore, to  
46 enhance understanding of the consequences of ACL injury, and improve treatment, the  
47 overall aim of the NACOX study is to investigate the natural corollaries and recovery after  
48 ACL injury. Understanding the complexity of the consequences of ACL injury may improve  
49 clinical decision-making to ensure best health care for patients.  
50

51  
52  
53  
54  
55  
56 To achieve the overall aim, there are five main study objectives:  
57  
58  
59  
60

- 1
- 2
- 3 A. To assess biological, psychological and social factors and their relationships to the
- 4 natural corollaries and recovery after acute ACL injury
- 5
- 6 B. To evaluate the choice of treatment after acute ACL-injury (i.e. ACL reconstruction,
- 7 ACLR or non-ACL reconstruction, non-ACLR)
- 8
- 9 C. To evaluate the return to sport after acute ACL injury
- 10
- 11 D. To study knee problems in the short and long term after acute ACL-injury
- 12
- 13 E. To identify proxies (biomarkers and structural risk factors) for early detection of
- 14 symptomatic and radiographic osteoarthritis
- 15
- 16
- 17
- 18
- 19

## 20 METHODS AND ANALYSIS

21 This study is a prospective multicenter prognostic cohort study. Patients will be consecutively  
22 recruited over approximately 20 months, from up to seven sites (mix of public and private  
23 health care clinics) in Sweden.

### 24 Inclusion and exclusion criteria

25 All patients with acute knee trauma presenting to the identified clinics are potentially  
26 eligible for participation.

27 Inclusion criteria: Patients with an ACL injury, sustained no more than 6 weeks prior to  
28 presentation, and aged between 15 and 40 years at time of ACL injury.

29 Exclusion criteria: previous ACL injury/ACL reconstruction on the same knee, serious  
30 concomitant knee injury (e.g. posterior cruciate ligament rupture, fracture that requires  
31 separate treatment), inability to understand written and spoken Swedish language, cognitive  
32 impairments, other illness or injury that impairs function (e.g. fibromyalgia, rheumatic  
33 diseases and other diagnoses associated with chronic pain).

### 34 Procedure

35 Recruitment of participants started in October 2016, and this study does not alter the usual  
36 course of treatment for patients with ACL injury at recruiting centres. This process is:

- 37 1. Patient receives a clinical diagnosis from an orthopedic surgeon, verified by MRI,  
38 within 2-6 weeks after their knee injury.
- 39
- 40
- 41
- 42
- 43
- 44
- 45
- 46
- 47
- 48
- 49
- 50
- 51
- 52
- 53
- 54
- 55
- 56
- 57
- 58
- 59
- 60

- 2
- 3 2. Initial treatment according to a supervised rehabilitation program of approximately
- 4 three months duration.<sup>21</sup>
- 5
- 6 3. Scheduled follow-up after approximately 3 months, where further treatment is
- 7 decided upon between patient and orthopaedic surgeon.
- 8
- 9

10 Consequently, patients of this cohort will follow one of the two following pathways: (1) ACLR  
11 plus post-operative supervised rehabilitation and (2) supervised rehabilitation alone (non-  
12 ACLR).  
13  
14

15  
16 Patients will receive information about the study at their initial contact with the health care  
17 provider. Subsequently, a member of the research team will contact the patient by phone to  
18 provide additional verbal information and obtain verbal consent. Patients who accept  
19 participation will be asked to sign a written informed consent form before questionnaires  
20 are sent via smartphone or e-mail. Questionnaires will be sent weekly for the first 6 weeks,  
21 fortnightly from week 7 to week 24, monthly from month 7 to month 12, and bi-monthly  
22 from year 1 to year 3 after initial injury. Questionnaire length varies from very short (10  
23 questions, approximately 2 min completion time) to longer at specific critical time points  
24 (Figure 1 and Table 1).  
25  
26  
27  
28  
29  
30

31  
32 A questionnaire about treatment choice (ACLR or non-ACLR) is completed by the patient,  
33 orthopedic surgeon and physiotherapist at the time the decision for ACLR or non-ACLR is  
34 made. A questionnaire about the decision to return to sport is completed by the patient and  
35 the physiotherapist when the patient reports that he/she is back to full participation in the  
36 goal sports/physical activity. For patients with ACLR, a new baseline questionnaire will be  
37 completed at the time of reconstruction. Subsequent data collection will continue according  
38 to the new baseline time point (Figure 1).  
39  
40  
41  
42  
43  
44

45 One subgroup (approximately 130 patients recruited from Linköping) will have extended  
46 follow-up data collection at baseline and 3, 6, 12 and 24 months after injury. At these time  
47 points, a clinical examination will be completed by a physiotherapist, physical activity will be  
48 registered over 5 consecutive days using a triaxial accelerometer (activPAL™,  
49 PALtechnologies, UK), knee MRI will be performed, and blood and urine samples will be  
50 collected. A joint fluid sample is acquired at baseline if indicated due to joint effusion, and at  
51 the time of any additional surgery including ACLR (if the patient has surgical treatment).  
52  
53  
54  
55  
56  
57  
58  
59  
60

1  
2  
3 Weight bearing radiographs are done at baseline and 5 years follow up. Patients who have  
4 ACLR are followed up with questionnaires and clinical examination with new baseline at the  
5 time of reconstruction. MRIs and blood and urine samples are followed up with the injury  
6 according to the index baseline (Figure 1). Additional verbal and written consent for  
7 collection of biological samples and imaging is obtained prior to any data collection.  
8  
9  
10

11  
12 *Figure 1 about here*  
13

## 14 Outcomes

15  
16 Reflecting a biopsychosocial approach, outcome measurement for this study will evaluate  
17 four main aspects: patient-reported outcomes, physical function, physical activity and  
18 physiological markers of joint injury (Figure 1).  
19  
20  
21

### 22 Patient-reported outcomes: all study participants

23  
24 Demographic and baseline characteristics including age, sex, BMI, smoking habits,  
25 occupation, preinjury activity level, medical and injury history, sick leave, preferences  
26 regarding treatment will be collected with the baseline questionnaire (Figure 2).  
27  
28  
29  
30

31  
32 Patient-reported *knee function and participation* will be assessed with the International  
33 Knee Documentation Committee Subjective Knee Form (IKDC-SKF),<sup>22</sup> a Single Assessment  
34 Numeric Evaluation (SANE) of global knee function,<sup>23</sup> and the four subscales of Knee injury  
35 and Osteoarthritis Outcome Score (Pain, other Symptoms, Function in sport and recreation  
36 (sport/rec) and knee-related quality of life (QOL); KOOS<sub>4</sub>).<sup>24</sup> Subjective *knee stability* during  
37 ADL and sports will each be assessed with a single numeric rating scale (1-10 scale) (Figure  
38 2).  
39  
40  
41  
42  
43

44  
45 The frequency of self-reported participation in *physical activity* will be collected according to  
46 the recommendations from Swedish National Board of Welfare. Participants will report the  
47 type of physical activity they participated in (e.g. football, strength training), and the level of  
48 participation (e.g. recreational, elite), during the previous week. Participation in up to 3  
49 activities can be recorded (Figure 2).<sup>25</sup>  
50  
51  
52  
53  
54  
55  
56  
57  
58  
59  
60

1  
2  
3 *Expectations* for recovery (2 questions) and fulfillment of expectations (1 question) will be  
4 assessed using 6-item Likert scales. Participants will be asked to indicate if their goal was to  
5 return to sport and reasons for not returning. *Motivation* to return to the preinjury physical  
6 activity will be evaluated using a questionnaire we developed based on the transtheoretical  
7 model of behavior change (Figure 2).<sup>18</sup>

8  
9  
10  
11  
12 The General *Self Efficacy* scale (GSES) will be used at baseline to assess the individual's  
13 beliefs that his/her actions determine successful outcome.<sup>26</sup> Knee-specific self-efficacy will  
14 be assessed with the subscale of the Knee Self Efficacy Scale (K-SES) that evaluates patients'  
15 perception of future knee function (4 questions).<sup>27</sup> *Psychological readiness* for return to  
16 sport will be assessed with the ACL-Return to Sport after Injury (ACL-RSI) questionnaire that  
17 includes questions on confidence in performance, emotions and risk appraisal.<sup>28</sup> *Satisfaction*  
18 with present knee function will be evaluated with a 7-item Likert scale ranging from  
19 "delighted" to "terrible".<sup>29</sup> Knee-related quality of life (QoL) will be assessed with the ACL-  
20 QoL questionnaire and KOOS QOL (Figure 2).<sup>30</sup>

21  
22  
23  
24  
25  
26  
27  
28  
29 Participants will be asked to indicate the *number of rehabilitation sessions* they have  
30 completed. *Adherence* to rehabilitation will be assessed by the patient and physiotherapist  
31 with the Sports Injury Rehabilitation Adherence Scale.<sup>31</sup> The importance of rehabilitation for  
32 the current knee function will be assessed on a 5-response scale ranging from "necessary for  
33 my current knee function" to "not necessary at all"<sup>32</sup>. Experience with health care will be  
34 assessed with a 5-item Likert scale ranging from "very good" to "very bad" (Figure 2).

35  
36  
37  
38  
39  
40 Information about *new knee injuries* will be collected using a direct question, which is  
41 followed up with phone call if the injury is severe, i.e. results in functional limitation during  
42 the following days or inability to participate in physical activity. *Knee problems during*  
43 *physical activity participation* will be assessed with the knee-specific part of the Oslo Sports  
44 Trauma Research Centre (OSTRC) questionnaire (Figure 2).<sup>33</sup>

45  
46  
47  
48  
49  
50 *Figure 2 about here.*

### Clinical examination: sub-group of study participants

The sub-group of participants recruited from one of the study sites (Linköping) will have clinical examinations of knee function, performed by either an orthopedic surgeon together with a physiotherapist (always for the baseline assessment), or physiotherapist alone, or physiotherapy student in the final year of education. All assessors will have standardised training in the clinical examination procedure.

*Knee status* will be assessed using knee joint effusion (circumference of the joint using a measurement tape, and the 'stroke test'<sup>34</sup>), knee joint laxity tests (Lachman test, Lever sign, anterior drawer and medial/lateral laxity), knee flexion and extension and ankle dorsiflexion range of motion, varus or valgus knee alignment. Instrumented knee laxity measurements will be assessed using the KT-1000 arthrometer at 133N and manual maximum (mean value of three repetitions).

*Functional performance* will be evaluated through qualitative assessment of gait (10m walking test), single leg squat, and four single-limb hop tests (single hop for distance, triple hop, crossover hop and 6-meter timed-hop).<sup>35</sup> *Postural control* will be assessed using a single-limb static balance task with eyes closed (SOLEC). Concentric quadriceps and hamstrings *strength* will be assessed using a Biodex dynamometer, at 60 degrees/second (5 repetitions) and 180 degrees/second (15 repetitions) angular velocities.

### Activity registration: sub-group of study participants

At the conclusion of the clinical examination, participants will be asked to wear a triaxial accelerometer (activPAL™ micro, PAL Technologies Ltd.) for a minimum of 5 days (maximum 7 days) immediately following the examination. The accelerometer will be attached mid-way between the hip and the injured knee according to the manufacturer's recommendations.

### Imaging: sub-group of study participants

Patients recruited in Linköping (approximately 130 patients) will undergo extensive imaging assessment and collection of biosamples.

Plain weight bearing *radiographs* – the current gold standard for assessment of radiographic osteoarthritis – will be obtained using a slightly modified method of the Lyon-Schuss view (participants stand, bearing equal weight through each limb<sup>36</sup>) and a standardised axial patellofemoral joint view (Table 1).<sup>37</sup>

*Magnetic resonance (MR) images* will be obtained from both knees at baseline for diagnostic purposes, to confirm an acute ACL tear in the index knee and to examine the status of the contralateral knee. At follow up, only the index knee will undergo MR image acquisition. MR images will be acquired using a Philips Ingenia 3T scanner with a 16-channel knee-coil and will be obtained at baseline, 3, 6, 12 and 24 months (Table 1).

Table 1. MR imaging, radiographic assessment and collection of biological samples over the study period for patients recruited at the Linköping site

|                        | Baseline | 3 months | 6 months | 12 months | 24 months | 60 months |
|------------------------|----------|----------|----------|-----------|-----------|-----------|
| WB radiographs         | X        | -        | -        | -         | -         | X         |
| Full clinical protocol | X*       | -        | -        | -         | -         | -         |
| Compositional protocol | X        | X        | X        | X         | -         | -         |
| Explorative protocol   | X        | X        | X        | X         | X         | X         |
| Blood                  | X        | X        | X        | X         | X         | X         |
| Urine                  | X        | X        | X        | X         | X         | X         |
| Joint fluid**          | X        |          |          |           |           |           |

\* *Bilateral assessment*

\*\* *Collection will be performed under anesthesia at the time of any surgery during follow up*

For *clinical evaluation and diagnostics*, the normal clinical protocol at the Linköping site will be followed (scan time 15 minutes, Table 2).

For *bone shape analyses*, a 3D PD sequence (scan time 6.5 minutes, Table 2) will be obtained.

For *compositional analysis* of cartilage and menisci, sagittal T2maps and T1Rho will be obtained (scan time approx. 16 minutes, Table 2).

For *exploratory purposes*, a new in-house developed sequence (Qmap) with the potential of reducing clinical and compositional scan time and adding explorative measures of T1-maps T2-maps and PD-maps will be obtained (scan time approximately 6 minutes, Table 2).<sup>38</sup>



Table 2. Detailed description of magnetic resonance imaging sequences

|                  |                                                                                                                                                                                                                  |
|------------------|------------------------------------------------------------------------------------------------------------------------------------------------------------------------------------------------------------------|
| Clinical package | Sagittal PD, 3 mm slice thickness with 0.3 mm gap. TE=20 ms; TR=1800 ms, ETL 10; FOV 160x145, ACQ matrix 516x384=0.31x0.38mm, recon matrix 528. Scan time 2:58 min.                                              |
|                  | Axial PD FatSat, 3 mm slice thickness with 0.3 mm gap. TE=35 ms; TR=3981 ms, ETL 15; FOV 140x140, ACQ matrix 332x330=0.42x0.42mm, recon matrix 512. Scan time 4:15min                                            |
|                  | Sagittal PD FatSat, 3 mm slice thickness with 0.3 mm gap. TE=30 ms; TR=3400 ms, ETL 15; FOV 160x145, ACQ matrix 468x399=0.31x0.40mm, recon matrix 528. Scan time 3:56min.                                        |
|                  | Coronal PD FatSat, 3 mm slice thickness with 0.3 mm gap. TE=30 ms; TR=3572 ms, ETL 16; FOV 160x140, ACQ matrix 516x332=0.31x0.42mm, recon matrix 528. Scan time 3:56min                                          |
| PD FS 3D         | Sagittal PD FatSat 3D, 0.63 mm slice thickness, TE=185, TR=1300, ETL=63, FOV=144x162, AQC matrix 228x226=0.63x0.63, recon matrix 448. Scan time 6:31min                                                          |
| T2map            | Sagittal T2-map (T2 relaxation), 3 mm slice thickness with 0.3 mm gap. TE=n*10 ms; TR=2371 ms, ETL 8; FOV 160x140, ACQ matrix 456x280=0.35x0.50mm, recon 560. Scan time 5:53min                                  |
| T1Rho            | 3D sagittal spin lock (T1Rho relaxation), 4 mm slice thickness. Spin lock time (1, 10, 20 and 40ms), (TE=3.3 ms; TR=6.4 ms, ETL 64; FOV 140x140, ACQ matrix 280x268=0.50x0.52mm, recon 352. Scan time 2:36min    |
| Qmap             | Sagittal Qmap (T1 relaxation, T2 relaxation, Proton Density), 3 mm slice thickness with 0.3 mm gap. TE=8.8/110 ms; TR=4217 ms, ETL 16; FOV 160x145, ACQ matrix 364x270=0.40x0.59mm, recon 576. Scan time 6:19min |

### Collection and storage of biological samples: sub-group of study participants

All samples will be stored in a dedicated biobank at -70°C.

*Joint fluid* (haemarthrosis) will be aspirated from the index knee at baseline to ascertain joint bleeding (highly indicative of severe knee injury), according to clinical routine. Due to the pain and discomfort associated with knee joint arthrocentesis (especially in knees without effusion), additional longitudinal collection of joint fluid will only be performed in case of

surgical procedure (collection will be during surgery). Collected samples will be centrifuged at 2500G for 10 minutes and aliquoted into 0.7ml tubes for storage.

*Venous blood* samples will be collected at the same visit as image acquisition. Collected samples will be centrifuged and aliquoted according to a specific protocol for storage.

*Urine samples* will be collected at first morning void (preferred). Collected samples will be centrifuged at 1800G for 10 minutes and aliquoted into 1.0mL tubes for storage at -70°C.

Analyses will include, but are not limited to, those presented in Table 3. In addition, several markers of inflammation, such as IL-6, IL-8, IL-10, IL-12, TNF- $\alpha$ , INF- $\gamma$ , will be analysed.

Table 3. Planned analyses of biomarkers

| BIOMARKER            | FLUID                   | PROCESS                      | TISSUE            |
|----------------------|-------------------------|------------------------------|-------------------|
| <b>ARGS-AGGRECAN</b> | Serum<br>Synovial fluid | Cartilage turnover           | Cartilage         |
| <b>CTX-II</b>        | Urine                   | Type II collagen degradation | Cartilage<br>Bone |
| <b>CTX-I</b>         | Serum<br>Urine          | Bone turnover                | Bone              |
| <b>COMP</b>          | Serum<br>Synovial fluid | Cartilage degradation        | Cartilage         |
| <b>C2C</b>           | Serum<br>Urine          | Type II collagen degradation | Cartilage         |
| <b>NTX-I</b>         | Serum<br>Urine          | Bone resorption              | Bone              |

### Decision making for choice of treatment and return to sport

Factors affecting the *decision of choice of treatment* (ACLR or not) will be evaluated by the patient, orthopedic surgeon and physiotherapist with questionnaires. Respondents will answer questions about why the particular treatment was chosen, if they perceive it was the right treatment choice, the agreement for choice of treatment between the clinicians and patient, about the patient's involvement and understanding of information, and about the communication between clinicians. The physiotherapist and patient also answer questions about patient rehabilitation.

1  
2  
3 Factors affecting the *decision for return to sports* (RTS) is evaluated at the time the patient  
4 replies that she/he is back to full sports participation of the goal sport/physical activity (with  
5 or without knee problems) based on the response to a question from the OSTRC  
6 questionnaire<sup>33</sup> (“have you had any difficulties participating in your sport activity due to  
7 your knee problems” with the response “full participation without or with knee problems”).  
8 Other questions capture the areas on how the decision for RTS was taken, possible criteria  
9 used to approve RTS, activity and participation modification.  
10  
11  
12  
13  
14  
15  
16  
17

### 18 Primary outcomes and statistical analyses

19 A suite of analyses is planned for each of the 5 main study objectives.  
20

21 **Study objective A: assessment of the biological, psychological and social factors, and**  
22 **their relationships to the natural corollaries and recovery after acute ACL injury**  
23  
24  
25

#### 26 *Specific aims:*

- 27  
28 1. Assess whether there is a relationship between knee status and self-reported  
29 function early (up to 8 weeks) following ACL injury, and the IKDC-SKF at 3 and 12  
30 months follow-up.  
31  
32
- 33 2. Assess whether there is a relationship between knee status in the first 8 weeks  
34 following injury and functional performance at 12 months follow-up  
35  
36
- 37 3. Evaluate how physical activity, self-reported activity participation or as measured by  
38 activPAL, in the first 8 weeks after ACL injury is related to self-reported function and  
39 functional performance at 3 and 12 months after injury.  
40  
41
- 42 4. Investigate the prognostic relationship between returning to physical activity after  
43 ACL injury, and key biological, psychological and social factors.  
44  
45

46 *Primary outcome:* Self-reported physical activity participation and IKDC subjective knee score  
47 at 12 months follow-up  
48  
49

50 *Secondary outcomes:* functional performance at 3, 6, 12 and 24 months follow-up, time to  
51 return to the goal physical activity  
52  
53

54 *Statistical analysis:* We will use generalised estimating equations (GEE) to assess longitudinal  
55 relationships between knee status and subjective knee function. The outcome variable will  
56  
57  
58  
59

1  
2  
3 be IKDC subjective knee form score. Predictor variables may include knee joint effusion,  
4 laxity and range of motion, and SANE.  
5

6  
7 We will use GEE to assess longitudinal relationships between knee status and functional  
8 performance. The outcome variables will be measures of hopping performance, strength  
9 and postural control. Predictor variables may include knee joint effusion, laxity and range of  
10 motion, and SANE.  
11  
12

13  
14 We will use multilevel modelling to assess relationships between physical activity and knee  
15 status. The outcome variable will be IKDC subjective knee form score. Predictor variables  
16 may include physical activity (self-reported and objectively measured), knee status (extent of  
17 index injury (i.e. concomitant injuries), knee joint effusion, laxity and range of motion), age  
18 and sex.  
19  
20  
21  
22

23  
24 We will use multilevel modelling to assess the prognostic relationship between returning to  
25 the goal physical activity and biopsychosocial factors. The outcome variable will be time to  
26 return to the goal physical activity. The predictor variables will be different biopsychosocial  
27 factors (collected with questionnaires and clinical examination). We will use factor analysis  
28 to guide which independent variables are entered into the model.  
29  
30  
31  
32  
33  
34

### 35 Study objective B: evaluation of the choice of treatment after ACL injury

#### 36 *Specific aims:*

- 37 1. Describe factors that are important for the choice of treatment after an ACL injury,  
38 i.e. ACLR or non-ACLR, from patients, orthopedic surgeons' and physical therapists'  
39 perspective  
40  
41  
42  
43
- 44 2. To confirm the factors identified as important for treatment choice, using  
45 demographic and patient-reported data  
46  
47
- 48 3. Assess the relationship between factors (biological, psychological, social factors and  
49 factors that affected the choice of treatment) and satisfactory knee function (IKDC  
50 subjective knee form) at 12 months  
51  
52
- 53 4. Describe the decision-making process for treatment and evaluate patient satisfaction  
54 with the decision that was made  
55  
56  
57  
58  
59  
60

1  
2  
3 *Primary outcomes:* satisfaction with the treatment choice and the relationship to patient-  
4 reported outcome (IKDC) at 12 months after injury or ACL-R  
5

6  
7 *Secondary outcomes:* factors affecting treatment decision  
8

9 *Statistical analysis:* we will summarise the treatment decision factors reported by patients  
10 and clinicians descriptively using frequency tables. We will confirm whether specific  
11 treatment factors exist for individual patients, by matching the patient's own demographic  
12 and/or patient-reported data to the relevant factor.  
13  
14

15  
16 We will use factor analysis to determine the common constructs underlying the factors that  
17 are important for the choice of treatment. The smaller number of related groups of factors  
18 will be used in a subsequent multivariable model. We will run separate analyses for the  
19 factors cited as important for the decision for ACLR and the factors cited as important for the  
20 decision for non-ACLR.  
21  
22

23  
24 Finally, we will use a multilevel model to estimate the relationship between biopsychosocial  
25 factors and self-reported knee function at 12 months. The outcome variable will be IKDC  
26 subjective knee form score at 12 months. The predictor variables may include clusters of  
27 biopsychosocial factors (identified in A - Assessment of the biological, psychological and  
28 social factors, and their relationships to the natural corollaries and recovery after acute ACL  
29 injury) and treatment choice clusters (independent variables). The model will be adjusted for  
30 treatment received (i.e. ACLR or non-ACLR).  
31  
32  
33  
34  
35  
36  
37  
38  
39

#### 40 **Study objective C: evaluation of return to sport after ACL injury**

##### 41 *Specific aims:*

- 42 1. Describe the decision-making process for return to sport following ACL injury
- 43 2. Describe the criteria physiotherapists use in clinical practice to clear patients to  
44 return to sport after ACL injury
- 45 3. Validate the criteria used to clear patients to return to sport after ACL injury

46  
47  
48  
49  
50  
51 *Primary outcome:* return to sport rate at 24 months follow-up

52  
53  
54 *Secondary outcomes:* time to return to sport, sports participation rates over time, incidence  
55 of new knee injuries  
56  
57

1  
2  
3 Statistical analysis: we will summarise the return to sport decision factors reported by  
4 patients and clinicians descriptively using frequency tables. We will also summarise the  
5 criteria used by clinicians to decide when the patient was ready to return to sport  
6 descriptively using frequency tables. To assess the discriminant validity of the criteria used  
7 to clear patients to return to sport after ACL injury, we will use logistic regression analyses to  
8 compare relevant outcomes (e.g. strength, effusion, range of motion) between participants  
9 who do and do not return to sport.  
10  
11  
12  
13  
14  
15  
16  
17

#### 18 Study objective D: knee problems in the short- and long-term after acute ACL injury

##### 19 *Specific aim:*

- 21 1. Describe the rate and nature of knee problems (new acute knee injury, gradual onset  
22 knee injury and osteoarthritis) after index ACL injury
- 23 2. Assess whether there is a relationship between biological, psychological and social  
24 factors, and new knee problems after acute ACL injury  
25  
26  
27  
28

29 Primary outcome: new acute knee injury

30  
31 Secondary outcomes: gradual onset knee injury, osteoarthritis

32  
33  
34 Statistical analysis: we will use a time-to-event analysis to estimate the rate of new acute  
35 knee injuries (may include new ACL tears, new meniscus tears), the rate of radiographic  
36 osteoarthritis and the rate of symptomatic osteoarthritis. The predictor variables may  
37 include concomitant injury to other knee structures at index ACL injury, treatment (ACLR or  
38 non-ACLR), sex, age and clusters of biopsychosocial factors (identified in A - Assessment of  
39 the biological, psychological and social factors, and their relationships to the natural  
40 corollaries and recovery after acute ACL injury).

41  
42 We will use a multi-level modeling approach to assess whether there is a relationship  
43 between biopsychosocial factors and gradual onset knee injuries. The independent variables  
44 may include clusters of biopsychosocial factors (identified in "Assessment of the biological,  
45 psychological and social factors, and their relationships to the natural corollaries and  
46 recovery after acute ACL injury"), treatment, sex and age.  
47  
48  
49  
50  
51  
52  
53  
54  
55  
56  
57  
58  
59  
60

## Study objective E: identification of proxies for early detection of osteoarthritis

### *Specific aims*

1. Identify imaging-based proxies of early radiographic and symptomatic osteoarthritis
2. Identify change in specific local and/or systemic molecular biomarkers (biological proxies) and investigate their relation to imaging based structural change and patient relevant outcomes
3. Investigate the temporal relation between symptoms, structure and biology after knee injury

*Primary outcome:* radiographic osteoarthritis at 5-years follow-up

*Secondary outcomes:* MR-defined at 2-years follow-up; symptoms as defined by IKDC subjective knee form and SANE at 2- and 5-years follow-up

*Statistical analysis:* We will use a multi-level modelling approach to relate predictor variables that may include imaging-based and biologically-based proxies, and possible risk factors (e.g. concomitant injury to other knee structures at index ACL injury, treatment (ACLR or non-ACLR), new meniscus injury, activity participation) to the primary and secondary outcomes. We will adjust for potential confounders that may include sex, age, and body mass index.

### Sample size calculation

For regression analysis in the different parts, using approximately 10 independent variables for each outcome, at least 130 participants will be included.<sup>39</sup> For part B and C, evaluating decision for treatment and RTS, we need geographically spread collected data in order to be generalisable. Since there might be different routines and common praxis among different clinics even in the same geographical area, it is important to include different clinics when collecting data. We are collecting data from seven different counties, and several clinics within these counties, spreading from south to north of Sweden. We expect to collect data regarding decision making from at least about 25 orthopedic surgeons (about 10% of all surgeons performing ACL reconstructions over Sweden) and at least 45 physiotherapists (there is no registry for the number of physiotherapists treating ACL injured patients in Sweden).

## Patient and Public Involvement

Participants will receive a short summary of the results following completion of the study.

## Timeline

Patient recruitment started in October 2016 and will continue until June 2018.

## Ethics and dissemination

Being included in this study will not influence which treatment the patient will receive. The study is approved by the regional Ethical committee in Linköping, Sweden (Dnr 2016/44-31 and 2017/221-32).

Results will be presented at national and international conferences and submitted for publication to peer-reviewed journals. Participants will receive short summary of the study.

## Figure legends

Figure 1. Flow chart of the NACOX study follow-up plan. w1, w2 and m3, m6 etc: denote weeks or months after injury. Each box denotes when a questionnaire will be sent; shaded boxes indicate extended questionnaires. Time points for clinical examination (blue arrows), Magnetic Resonance Imaging (MRI) and lab and x-rays (black arrows) are indicated. Baseline questionnaire, clinical examination, MRI, lab and x-ray are within 6 weeks after the injury.

Figure 2. Reported outcomes at different time points after injury or reconstruction. KOOS<sub>4</sub>, Knee Injury and Osteoarthritis Outcome Score, subscales for pain, symptoms, function in sport and recreation and knee-related quality of life; RTS, return to sport; \*, answered by the patient, orthopedic surgeon and physiotherapist; (x), only some questions are asked during these timepoints; <sup>1</sup>, question answered when the decision for ACLR is made; <sup>2</sup>, question answered by the patient and physiotherapist when the patient has returned to full sports participation; <sup>3</sup>, assessed only for non-ACLR; <sup>4</sup>, only the subscales "life style" and "social and emotional" of the ACL-QoL; QoL, quality of life.



## References

1. Frobell RB, Lohmander LS, Roos HP. Acute rotational trauma to the knee: poor agreement between clinical assessment and magnetic resonance imaging findings. *Scand J Med Sci Sports* 2007;17(2):109-14.
2. Grindem H, Eitzen I, Engebretsen L, et al. Nonsurgical or Surgical Treatment of ACL Injuries: Knee Function, Sports Participation, and Knee Reinjury: The Delaware-Oslo ACL Cohort Study. *J Bone Joint Surg Am* 2014;96(15):1233-41.
3. Lohmander LS, Englund PM, Dahl LL, et al. The long-term consequence of anterior cruciate ligament and meniscus injuries: osteoarthritis. *Am J Sports Med* 2007;35(10):1756-69.
4. Ajuied A, Wong F, Smith C, et al. Anterior cruciate ligament injury and radiologic progression of knee osteoarthritis: a systematic review and meta-analysis. *Am J Sports Med* 2014;42(9):2242-52.
5. Sanders TL, Kremers HM, Bryan AJ, et al. Is anterior cruciate ligament reconstruction effective in preventing secondary meniscal tears and osteoarthritis? *Am J Sports Med* 2016;44(7):1699-707.
6. Frobell RB, Roos HP, Roos EM, et al. Treatment for acute anterior cruciate ligament tear: five year outcome of randomised trial. *BMJ* 2013;346:f232.
7. Grindem H, Eitzen I, Moksnes H, et al. A pair-matched comparison of return to pivoting sports at 1 year in anterior cruciate ligament-injured patients after a nonoperative versus an operative treatment course. *Am J Sports Med* 2012;40(11):2509-16.
8. Österberg A, Kvist J, Dahlgren MA. Ways of experiencing participation and factors affecting the activity level after nonreconstructed anterior cruciate ligament injury: a qualitative study. *J Orthop Sports Phys Ther* 2013;43(3):172-83.
9. Ardern C, Kvist J, Webster K. Psychological aspects of anterior cruciate ligament injuries. *Operative Techniques in Sports Medicine* 2016;24(1):77-83.
10. Chalmers PN, Mall NA, Moric M, et al. Does ACL reconstruction alter natural history?: A systematic literature review of long-term outcomes. *J Bone Joint Surg Am* 2014;96(4):292-300.
11. Nordenvall R, Bahmanyar S, Adami J, et al. Cruciate ligament reconstruction and risk of knee osteoarthritis: the association between cruciate ligament injury and post-traumatic osteoarthritis. a population based nationwide study in Sweden, 1987-2009. *PLoS one* 2014;9(8):e104681.
12. Øiestad BE, Engebretsen L, Storheim K, et al. Knee osteoarthritis after anterior cruciate ligament injury: a systematic review. *Am J Sports Med* 2009;37(7):1434-43.
13. Larsson S, Struglics A, Lohmander LS, et al. Surgical reconstruction of ruptured anterior cruciate ligament prolongs trauma-induced increase of inflammatory cytokines in synovial fluid: an exploratory analysis in the KANON trial. *Osteoarthritis Cartilage* 2017;25(9):1443-51.
14. Davis JC, Bryan S. Patient Reported Outcome Measures (PROMs) have arrived in sports and exercise medicine: Why do they matter? *Br J Sports Med* 2015;49(24):1545-6.
15. Graham B, Green A, James M, et al. Measuring patient satisfaction in orthopaedic surgery. *The J Bone Joint Surg Am* 2015;97(1):80-4.
16. Ardern CL, Österberg A, Sonesson S, et al. Satisfaction with knee function after primary anterior cruciate ligament reconstruction is associated with self-efficacy, quality of life, and returning to the preinjury physical activity. *Arthroscopy* 2016;32(8):1631-38.
17. Engstrand C, Kvist J, Krevers B. Patients' perspective on surgical intervention for Dupuytren's disease - experiences, expectations and appraisal of results. *Disabil Rehabil* 2016;38(26):2538-49.
18. Sonesson S, Kvist J, Ardern C, et al. Psychological factors are important to return to pre-injury sport activity after anterior cruciate ligament reconstruction: expect and motivate to satisfy. *Knee Surg Sports Traumatol Arthrosc* 2016;25(5):1375-84.

19. Lynch AD, Logerstedt DS, Grindem H, et al. Consensus criteria for defining 'successful outcome' after ACL injury and reconstruction: a Delaware-Oslo ACL cohort investigation. *Br J Sports Med* 2015;49(5):335-42.
20. Filbay SR, Roos EM, Frobell RB, et al. Delaying ACL reconstruction and treating with exercise therapy alone may alter prognostic factors for 5-year outcome: an exploratory analysis of the KANON trial. *Br J Sports Med* 2017;51(22):1622-29.
21. Ahlden M, Kvist J, Samuelsson K, et al. [Individualized therapy is important in anterior cruciate ligament injuries]. *Lakartidningen* 2014;111(36):1440-3.
22. Tigerstrand Grevnerts H, Grävare Silbernagel K, Sonesson S, et al. Translation and testing of measurement properties of the Swedish version of the IKDC subjective knee form. *Scand J Med Sci Sports* 2017;27(5):554-62.
23. Shelbourne KD, Barnes AF, Gray T. Correlation of a single assessment numeric evaluation (SANE) rating with modified Cincinnati Knee Rating System and IKDC subjective total scores for patients after ACL reconstruction or knee arthroscopy. *Am J Sports Med* 2012;40(11):2487-91.
24. Roos EM, Roos HP, Ekdahl C, et al. Knee injury and Osteoarthritis Outcome Score (KOOS)-- validation of a Swedish version. *Scand J Med Sci Sports* 1998;8(6):439-48.
25. Grindem H, Eitzen I, Snyder-Mackler L, et al. Online registration of monthly sports participation after anterior cruciate ligament injury: a reliability and validity study. *Br J Sports Med* 2014;48(9):748-53.
26. Love J, Moore CD, Hensing G. Validation of the Swedish translation of the General Self-Efficacy scale. *Qual Life Res* 2012;21(7):1249-53.
27. Thomeé P, Währborg P, Börjesson M, et al. A new instrument for measuring self-efficacy in patients with an anterior cruciate ligament injury. *Scand J Med Sci Sports* 2006;16(3):181-7.
28. Kvist J, Österberg A, Gauffin H, et al. Translation and measurement properties of the Swedish version of ACL-Return to Sports after Injury questionnaire. *Scand J Med Sci Sports* 2013;23(5):568-75.
29. Cherkin DC, Deyo RA, Street JH, et al. Predicting poor outcomes for back pain seen in primary care using patients' own criteria. *Spine (Phila Pa 1976)* 1996;21(24):2900-7.
30. Mohtadi N. Development and validation of the quality of life outcome measure (questionnaire) for chronic anterior cruciate ligament deficiency. *Am J Sports Med* 1998;26(3):350-9.
31. Kolt GS, Brewer BW, Pizzari T, et al. The Sport Injury Rehabilitation Adherence Scale: a reliable scale for use in clinical physiotherapy. *Physiotherapy* 2007;93(1):17-22.
32. Fältström A, Hagglund M, Kvist J. Factors associated with playing football after anterior cruciate ligament reconstruction in female football players. *Scand J Med Sci Sports* 2016;26(11):1343-52.
33. Clarsen B, Myklebust G, Bahr R. Development and validation of a new method for the registration of overuse injuries in sports injury epidemiology: the Oslo Sports Trauma Research Centre (OSTRC) overuse injury questionnaire. *Br J Sports Med* 2013;47(8):495-502.
34. Sturgill LP, Snyder-Mackler L, Manal TJ, et al. Interrater reliability of a clinical scale to assess knee joint effusion. *J Orthop Sports Phys Ther* 2009;39(12):845-9.
35. Reid A, Birmingham TB, Stratford PW, et al. Hop testing provides a reliable and valid outcome measure during rehabilitation after anterior cruciate ligament reconstruction. *Phys Ther* 2007;87(3):337-49.
36. Brandt KD, Mazzuca SA, Conrozier T, et al. Which is the best radiographic protocol for a clinical trial of a structure modifying drug in patients with knee osteoarthritis? *J Rheumatol* 2002;29(6):1308-20.
37. Boegard TL, Rudling O, Petersson IF, et al. Joint space width of the tibiofemoral and of the patellofemoral joint in chronic knee pain with or without radiographic osteoarthritis: a 2-year follow-up. *Osteoarthritis Cartilage* 2003;11(5):370-6.
38. Warntjes JB, Leinhard OD, West J, et al. Rapid magnetic resonance quantification on the brain: optimization for clinical usage. *Magn Reson Med* 2008;60(2):320-9.

1  
2  
3 39. Tabatchnick BG, Fidell LS. Using multivariate statistics. 4th ed. Needham Heights, MA: Allyn &  
4 Bacon 2001.  
5  
6  
7  
8  
9  
10

### 11 Authors' contributions:

12 JK wrote the first draft and coordinated the preparation of the protocol together with CA. HG, HTG,  
13 MH, AS and RF were responsible for different parts of the protocol writing. All authors revised and  
14 accepted the final manuscript of the protocol.  
15  
16  
17  
18

### 19 Funding statement

20 This work is supported by the Swedish Medical Research Council (VR 2015-03687), the Swedish  
21 Research Council for Sport Science (CIF P2016-0063 and P2017-0151), the Medical Research Council  
22 of Southeast Sweden FORSS (FORSS -662081) and the Medical Faculty at Linköping University,  
23 Sweden.  
24  
25  
26  
27  
28  
29  
30  
31  
32  
33  
34  
35  
36  
37  
38  
39  
40  
41  
42  
43  
44  
45  
46  
47  
48  
49  
50  
51  
52  
53  
54  
55  
56  
57  
58  
59  
60

## Acknowledgement

The NACOX Cohort study group involves the authors named on this paper and the following collaborators:

- Michael A Bowes, Sr Director Clinical Applications, Imorphics Ltd, Manchester, UK
- Victor Casula, PhD, Research Unit of Medical Imaging, Physics and Technology, University of Oulu, Finland
- Anna Fahlgren, Associate Professor, Experimentell Ortopedi, Department of Clinical and Experimental Medicine, Linköping University, Sweden
- Anne Fältström, Physiotherapist, PhD, Region Jönköping County, Rehabilitation Centre, Ryhov County Hospital, Jönköping
- Johan Kihlberg, Radiographer, Center for Medical Image Science and Visualization (CMIV), Department of Medical and Health Sciences, Linköping University, Sweden
- Barbro Krevers, Associate Professor, Division of Health Care Analysis, Department of Medical and Health Sciences, Linköping University, Sweden
- Maria Lindblom, MD Center for Medical Image Science and Visualization (CMIV), Department of Radiology, Linköping University, Sweden
- Per Magnusson, Adjunct Professor, Clinical Chemistry, Department of Clinical and Experimental Medicine, Linköping University, Sweden
- Miika Nieminen, Professor, Research Unit of Medical Imaging, Physics and Technology, University of Oulu, Finland; Department of Diagnostic Radiology, Oulu University Hospital, Finland
- Anders Persson, Professor, Center for Medical Image Science and Visualization (CMIV), Department of Medical and Health Sciences, Linköping University, Sweden

## Competing interests statement

None declared



Figure 1. Flow chart of the NACOX study follow-up plan. w1, w2 and m3, m6 etc: denote weeks or months after injury. Each box denotes when a questionnaire will be sent; shaded boxes indicate extended questionnaires. Time points for clinical examination (blue arrows), Magnetic Resonance Imaging (MRI) and lab and x-rays (black arrows) are indicated. Baseline questionnaire, clinical examination, MRI, lab and x-ray are within 6 weeks after the injury.

139x77mm (300 x 300 DPI)

|                                   | Baseline | w1 | w2 | w3 | w4 | w5  | w6 | w8  | w10 | m3  | w16 | w18 | w20 | w22   | w24 | m6     | m7-11 | m12    | m14-22 | m24   | m26-36 | m36 | Extra |
|-----------------------------------|----------|----|----|----|----|-----|----|-----|-----|-----|-----|-----|-----|-------|-----|--------|-------|--------|--------|-------|--------|-----|-------|
| Injury                            | Baseline | w1 | w2 | w3 | w4 | w5  | w6 | w8  | w10 | m3  | w16 | w18 | w20 | w22   | w24 | m6     | m7-11 | m12    | m14-22 | m24   | m26-36 | m36 | Extra |
| Reconstruction                    | Preop    | w2 | w4 | w5 | w8 | w10 | m3 | w16 | w18 | w20 | w22 | w24 | m6  | m7-11 | m12 | m14-22 | m24   | m26-36 | m36    | Extra |        |     |       |
| Demographics and baseline         | x        |    |    |    |    |     |    |     |     | (x) |     |     |     |       |     | (x)    |       |        |        | (x)   |        |     | (x)   |
| Knee function and participation   | x        |    |    |    |    |     |    |     |     |     |     |     |     |       |     |        |       |        |        |       |        |     |       |
| IKDC-SKF                          | x        |    |    |    | x  |     |    |     |     |     |     |     |     |       |     |        |       |        |        |       |        |     |       |
| SANE                              | x        | x  | x  | x  | x  | x   | x  | x   | x   | x   | x   | x   | x   | x     | x   | x      | x     | x      | x      | x     | x      | x   | x     |
| Subjective knee stability         | x        | x  |    |    | x  |     |    |     |     |     |     |     |     |       |     |        |       |        |        |       |        |     |       |
| Giving way                        | x        |    |    |    |    |     |    |     |     |     |     |     |     |       |     |        |       |        |        |       |        |     |       |
| KOOS                              |          |    |    |    |    |     |    |     |     |     |     |     |     |       |     |        |       |        |        |       |        |     |       |
| Physical activity participation   | x        | x  | x  | x  | x  | x   | x  | x   | x   | x   | x   | x   | x   | x     | x   | x      | x     | x      | x      | x     | x      | x   | x     |
| Expectations and fulfillment      | x        | x  |    |    | x  |     |    |     |     |     |     |     |     |       |     |        |       |        |        |       |        |     |       |
| Motivation to RTS                 | x        | x  |    |    |    |     |    |     |     |     |     |     |     |       |     |        |       |        |        |       |        |     |       |
| RTS (goal and actual RTS)         | x        | x  |    |    | x  |     |    |     |     |     |     |     |     |       |     |        |       |        |        |       |        |     |       |
| Reasons for not RTS               |          |    |    |    |    |     |    |     |     |     |     |     |     |       |     |        |       |        |        |       |        |     |       |
| Factors affecting RTS             |          |    |    |    |    |     |    |     |     |     |     |     |     |       |     |        |       |        |        |       |        |     |       |
| Psychological factors             |          |    |    |    |    |     |    |     |     |     |     |     |     |       |     |        |       |        |        |       |        |     |       |
| General self efficacy             | x        |    |    |    |    |     |    |     |     |     |     |     |     |       |     |        |       |        |        |       |        |     |       |
| Knee self efficacy                | x        | x  |    |    |    |     |    |     |     |     |     |     |     |       |     |        |       |        |        |       |        |     |       |
| ACL-RSI                           |          |    |    |    |    |     |    |     |     |     |     |     |     |       |     |        |       |        |        |       |        |     |       |
| Satisfaction                      |          |    |    |    |    |     |    |     |     |     |     |     |     |       |     |        |       |        |        |       |        |     |       |
| Quality of Life                   |          |    |    |    |    |     |    |     |     |     |     |     |     |       |     |        |       |        |        |       |        |     |       |
| ACL-QoL                           |          |    |    |    |    |     |    |     |     |     |     |     |     |       |     |        |       |        |        |       |        |     |       |
| KOOS QoL                          |          |    |    |    |    |     |    |     |     |     |     |     |     |       |     |        |       |        |        |       |        |     |       |
| Rehabilitation and health care    |          |    |    |    |    |     |    |     |     |     |     |     |     |       |     |        |       |        |        |       |        |     |       |
| Frequency                         |          |    | x  | x  | x  | x   | x  | x   | x   | x   | x   | x   | x   | x     | x   | x      | x     | x      | x      | x     | x      | x   | x     |
| Adherence                         |          |    |    |    |    |     |    |     |     |     |     |     |     |       |     |        |       |        |        |       |        |     |       |
| Importance                        |          |    |    |    |    |     |    |     |     |     |     |     |     |       |     |        |       |        |        |       |        |     |       |
| Experience with health care       |          |    |    |    |    |     |    |     |     |     |     |     |     |       |     |        |       |        |        |       |        |     |       |
| Decision of treatment*            |          |    |    |    |    |     |    |     |     |     |     |     |     |       |     |        |       |        |        |       |        |     |       |
| New injuries                      |          | x  | x  | x  | x  | x   | x  | x   | x   | x   | x   | x   | x   | x     | x   | x      | x     | x      | x      | x     | x      | x   | x     |
| Problems during physical activity |          |    |    |    |    |     |    |     |     |     |     |     |     |       |     |        |       |        |        |       |        |     |       |

Figure 2. Reported outcomes at different time points after injury or reconstruction. KOOS4, Knee Injury and Osteoarthritis Outcome Score, subscales for pain, symptoms, function in sport and recreation and knee-related quality of life; RTS, return to sport; \*, answered by the patient, orthopedic surgeon and physiotherapist; (x), only some questions are asked during these timepoints; 1, question answered when the decision for ACLR is made; 2, question answered by the patient and physiotherapist when the patient has returned to full sports participation; 3, assessed only for non-ACLR; 4, only the subscales "life style" and "social and emotional" of the ACL-QoL; QoL, quality of life.

126x59mm (300 x 300 DPI)
